# Supplementary material for: Exploring Histone Acetylation in Ischemic Stroke: The Role of CREBBP and CKAP4 as Key Biomarkers
Source: Research Square preprint supplement (doi:10.21203/rs.3.rs-6336853/v1), 2025-04-24
Supplement: Supplementary file 1 [file fef6a9f2f3013e0fa53b03f1.xlsx]

## Sheet: CREBBP
	Online Resource 3 Table of pathways enriched by biomarker KEGG analysis
ID	Description	setSize	enrichmentScore	NES	pvalue	p.adjust	qvalue	rank	leading_edge	core_enrichment
KEGG_RIBOSOME	KEGG_RIBOSOME	KEGG_RIBOSOME	82	-0.662246	-2.68979	5.0194025850195e-14	9.1353127047355e-12	5.12507421838834e-12	4073	tags=78%, list=30%, signal=55%	6122/6204/6170/6227/6173/6135/28998/6158/6232/9349/6137/6192/6194/6167/9045/6129/6132/6181/6128/6233/2197/6218/6154/6234/6201/6231/6159/6168/6130/6139/6152/6125/6136/6157/6205/6169/6156/11224/6217/6188/6203/6142/6161/6230/3921/4736/6224/25873/6209/6143/6176/6141/6207/6124/6193/6175/6166/6228/6147/23521/6223/6191/6146/6187
KEGG_CHEMOKINE_SIGNALING_PATHWAY	KEGG_CHEMOKINE_SIGNALING_PATHWAY	KEGG_CHEMOKINE_SIGNALING_PATHWAY	174	0.432997780216483	2.07097836221094	6.39290360665275e-09	3.88865956392298e-07	2.18160773684517e-07	2766	tags=39%, list=20%, signal=31%	5058/57580/6774/10451/3717/673/2932/26230/6777/9547/1147/196883/58191/409/4067/5894/2773/7454/5580/2185/5293/5566/2783/5594/7409/2885/3718/5829/5595/1230/2787/5197/6093/23533/5906/6655/5590/1398/112/6464/8517/3055/5294/2790/2791/6772/108/5473/5330/59345/9844/6354/5291/6374/8503/653361/107/10344/998/5332/2268/2771/6773/3845/94235/6363/2921
KEGG_REGULATION_OF_ACTIN_CYTOSKELETON	KEGG_REGULATION_OF_ACTIN_CYTOSKELETON	KEGG_REGULATION_OF_ACTIN_CYTOSKELETON	193	0.426291166298029	2.05793369353657	6.40987840207085e-09	3.88865956392298e-07	2.18160773684517e-07	3593	tags=44%, list=26%, signal=33%	5058/4627/85464/10451/673/26230/7414/3684/87/10788/3674/10398/8826/5894/6548/7454/3690/3678/5293/5062/10163/3687/54434/5594/7409/4478/3693/5829/81624/81/5595/623/6093/23365/1729/23533/6655/1398/4638/54961/5294/10297/128239/1950/3681/10109/60/8394/624/3985/1730/324/3689/5063/89846/9965/5291/8503/1956/4342/2258/998/345456/3845/2768/23191/929/58498/3675/55740/3672/5881/5155/5290/10092/56034/23396/38…
KEGG_PARKINSONS_DISEASE	KEGG_PARKINSONS_DISEASE	KEGG_PARKINSONS_DISEASE	87	-0.560647	-2.29393	2.13619716618853e-08	9.71969710615782e-07	5.45292434527073e-07	1937	tags=41%, list=14%, signal=36%	1347/4697/6389/11315/1327/4716/374291/4694/1337/1345/4701/1350/4704/4717/4706/4696/54205/4711/1329/7388/1351/4713/4708/1537/4723/291/4702/7386/7419/4722/4725/9377/4714/4724/292/4728
KEGG_LEUKOCYTE_TRANSENDOTHELIAL_MIGRATION	KEGG_LEUKOCYTE_TRANSENDOTHELIAL_MIGRATION	KEGG_LEUKOCYTE_TRANSENDOTHELIAL_MIGRATION	106	0.503351468615668	2.20599275328076	3.34018007034119e-08	1.07798813608295e-06	6.04770672065044e-07	2507	tags=41%, list=18%, signal=33%	1432/10451/4318/5336/1495/7414/3684/87/7408/5175/10398/2773/2185/5293/7409/4478/5829/90952/81/6093/23533/83700/5906/51208/4689/5294/5781/4688/6494/60/50848/1499/3689/7122/1365/4313/5291/8503/653361/7070/9080/998/2771
KEGG_SPLICEOSOME	KEGG_SPLICEOSOME	KEGG_SPLICEOSOME	90	-0.527561	-2.16348	3.5538070420317e-08	1.07798813608295e-06	6.04770672065044e-07	2804	tags=47%, list=20%, signal=37%	23658/10084/84991/10915/23451/84950/51691/22916/10713/84844/6635/9129/83443/10907/6632/6629/9092/1655/6637/5356/11338/10946/6634/26121/27339/27316/51645/6628/1665/4116/6626/9984/151903/51690/84321/25804/6631/57819/6636/3312/10465/6627
KEGG_OXIDATIVE_PHOSPHORYLATION	KEGG_OXIDATIVE_PHOSPHORYLATION	KEGG_OXIDATIVE_PHOSPHORYLATION	91	-0.533734	-2.19341	8.4927493017189e-08	2.20811481844691e-06	1.23879200340862e-06	2021	tags=43%, list=15%, signal=37%	90423/9550/1347/4697/6389/1327/4716/374291/4694/1337/1345/126328/4701/1350/4704/4717/4706/1352/4696/4711/1329/5464/1353/7388/10063/1351/4713/4708/9296/1537/4723/4702/7386/4722/4725/9377/4714/4724/4728
KEGG_FC_GAMMA_R_MEDIATED_PHAGOCYTOSIS	KEGG_FC_GAMMA_R_MEDIATED_PHAGOCYTOSIS	KEGG_FC_GAMMA_R_MEDIATED_PHAGOCYTOSIS	87	0.51570474484209	2.18371300955317	1.59687161492733e-07	3.63288292395968e-06	2.0381124558941e-06	2267	tags=41%, list=16%, signal=35%	5058/4082/10451/5336/5337/7408/4067/5894/7454/5580/2209/5293/10163/2212/5594/7409/3635/6850/9846/5595/26052/10810/1785/23533/1398/3055/5294/8877/10109/8394/8398/3985/273/5291/8503/653361
KEGG_COMPLEMENT_AND_COAGULATION_CASCADES	KEGG_COMPLEMENT_AND_COAGULATION_CASCADES	KEGG_COMPLEMENT_AND_COAGULATION_CASCADES	67	0.552285910454777	2.26201619539241	2.70428264029907e-07	5.46866045038257e-06	3.06801656267848e-06	3452	tags=52%, list=25%, signal=39%	728/2153/2161/5627/1378/7035/5265/719/4179/2162/7450/1604/727/5328/623/966/5329/7056/712/713/624/714/722/2159/733/2158/710/5624/5054/729/5648/717/3818/2152/2160
KEGG_HUNTINGTONS_DISEASE	KEGG_HUNTINGTONS_DISEASE	KEGG_HUNTINGTONS_DISEASE	145	-0.450606	-1.99651	3.31190951342128e-07	6.02767531442673e-06	3.38163392423015e-06	2008	tags=34%, list=15%, signal=29%	5433/1347/6908/4697/6389/3066/64446/1327/5432/55081/4716/374291/4694/1337/1345/3065/5438/5435/4701/10540/1350/4704/4717/4706/4696/54205/4711/1329/7388/1351/4713/4708/5436/1537/4723/291/4702/7386/7419/4722/4725/5441/9377/4714/4724/6647/5437/292/4728
KEGG_FOCAL_ADHESION	KEGG_FOCAL_ADHESION	KEGG_FOCAL_ADHESION	186	0.382486627123562	1.84095021905658	2.3338414398416e-06	3.86144674591974e-05	2.16634085803479e-05	2263	tags=28%, list=16%, signal=24%	5058/5728/7094/10451/673/2932/5170/7414/87/7408/3480/3674/10398/5894/3690/3678/7057/7450/5293/5062/329/5594/7409/2885/3693/5829/81/5595/7791/6093/1729/23533/5906/6655/1398/4638/6464/5294/1284/6714/2889/1950/60/7059/1302/1499/2321/5063/3725/5291/2316/1293/8503
KEGG_DNA_REPLICATION	KEGG_DNA_REPLICATION	KEGG_DNA_REPLICATION	31	-0.665647	-2.19836	2.87030850094052e-06	4.01843190131672e-05	2.25441234486826e-05	3730	tags=77%, list=27%, signal=57%	5424/5981/6117/5427/29935/4175/5985/4176/4173/5111/5983/2237/5426/5984/56655/3978/5557/10535/246243/6119/4172/6742/6118/54107
KEGG_PURINE_METABOLISM	KEGG_PURINE_METABOLISM	KEGG_PURINE_METABOLISM	142	-0.425617	-1.87777	2.70244029491779e-06	4.01843190131672e-05	2.25441234486826e-05	2502	tags=35%, list=18%, signal=29%	115/26289/51728/5634/29922/661/10621/8382/5433/4882/5198/84172/654364/5432/4907/11128/5426/471/5147/2272/56655/5438/5144/100/5435/5471/203/5557/9533/158/1716/955/6240/5150/3615/204/84265/5158/4832/5436/5441/5631/64425/3704/3251/353/30833/54107/4830/5437
KEGG_ERBB_SIGNALING_PATHWAY	KEGG_ERBB_SIGNALING_PATHWAY	KEGG_ERBB_SIGNALING_PATHWAY	82	0.464382810027107	1.94986555909577	2.58712381641309e-05	0.000336326096133702	0.000188684970069225	2694	tags=45%, list=20%, signal=37%	5058/673/2932/6416/6777/5336/6776/818/5894/5293/5062/7039/5594/2885/5595/23533/6655/1398/6464/867/5294/2069/6714/1950/2549/8440/5609/5063/3725/685/5291/8503/1956/1839/2065/3845/2066
KEGG_TOLL_LIKE_RECEPTOR_SIGNALING_PATHWAY	KEGG_TOLL_LIKE_RECEPTOR_SIGNALING_PATHWAY	KEGG_TOLL_LIKE_RECEPTOR_SIGNALING_PATHWAY	96	0.440643314008166	1.89428198485533	2.88930276840898e-05	0.00035056873590029	0.000196675346340822	2657	tags=38%, list=19%, signal=30%	1432/7099/10333/7097/51311/6416/3454/1147/2353/4615/23643/5293/5594/54472/3455/7100/29110/5595/3553/23533/5606/353376/8517/3440/5294/8737/6772/5609/3447/3725/5291/8503/3663/51284/929/3452
KEGG_EPITHELIAL_CELL_SIGNALING_IN_HELICOBACTER_PYLORI_INFECTION	KEGG_EPITHELIAL_CELL_SIGNALING_IN_HELICOBACTER_PYLORI_INFECTION	KEGG_EPITHELIAL_CELL_SIGNALING_IN_HELICOBACTER_PYLORI_INFECTION	62	0.493897852690356	1.97134789896767	3.79411316735507e-05	0.000431580372786639	0.000242124327127264	2664	tags=42%, list=19%, signal=34%	5058/1432/523/6416/526/5336/1147/4067/535/537/527/83700/8517/5781/6868/6714/51382/9114/50848/533/3725/1956/1839/998/10312/51606
KEGG_NEUROTROPHIN_SIGNALING_PATHWAY	KEGG_NEUROTROPHIN_SIGNALING_PATHWAY	KEGG_NEUROTROPHIN_SIGNALING_PATHWAY	115	0.408496936514525	1.82255199399389	5.01296217203494e-05	0.000536681832535505	0.000301088130456588	2475	tags=36%, list=18%, signal=29%	8660/1432/673/2932/57498/5170/11213/5336/6272/818/9252/5894/6195/5580/5293/9261/5594/2885/5595/23533/5906/6655/1398/6464/7529/5294/5781/2889/2549/4804/7533/397/4914/5609/3725/4908/5291/4215/8503/7532/998
KEGG_PYRUVATE_METABOLISM	KEGG_PYRUVATE_METABOLISM	KEGG_PYRUVATE_METABOLISM	39	-0.571793	-2.00024	6.32419372265523e-05	0.000633418580879918	0.00035535918071343	2255	tags=41%, list=16%, signal=34%	219/84264/32/1737/84532/9380/134526/2739/5160/98/4191/3945/5162/231/38/4190
KEGG_PYRIMIDINE_METABOLISM	KEGG_PYRIMIDINE_METABOLISM	KEGG_PYRIMIDINE_METABOLISM	88	-0.459656	-1.87638	6.6126115586365e-05	0.000633418580879918	0.00035535918071343	2492	tags=41%, list=18%, signal=34%	7372/51728/29922/661/10621/8382/5433/84172/7371/654364/5432/4907/790/11128/5426/56655/5438/139596/5435/1854/5557/9533/955/6240/54963/84265/4832/5436/5441/64425/3704/30833/54107/1635/4830/5437
KEGG_ALLOGRAFT_REJECTION	KEGG_ALLOGRAFT_REJECTION	KEGG_ALLOGRAFT_REJECTION	35	-0.593134	-2.01539	9.59325820129617e-05	0.000831415710779001	0.000466439120564275	3726	tags=60%, list=27%, signal=44%	3458/3592/3593/941/5551/3125/3117/942/3002/7124/3122/3115/3111/3112/3119/958/356/3109/3113/959/3108
KEGG_PATHWAYS_IN_CANCER	KEGG_PATHWAYS_IN_CANCER	KEGG_PATHWAYS_IN_CANCER	311	0.303667915259705	1.53875643465398	9.23223558465443e-05	0.000831415710779001	0.000466439120564275	2517	tags=28%, list=18%, signal=23%	1387/5728/6774/1871/673/2932/10928/6777/4318/23604/54583/5336/1495/1147/6776/6256/2353/5337/1438/3480/5899/637/4087/8554/1030/3674/5894/8031/1441/5293/7039/7046/5743/329/5594/2034/2885/1612/5595/3091/23533/2322/6655/1398/1857/6789/867/8517/6688/598/650/5294/51588/1284/10297/8900/2033/1950/1050/6934/5915/6772/81029/1499/5914/4914/6258/324/8324/3725/7472/9965/4313/1488/5291/8321/8503/7175/1956/4149…
KEGG_ENDOCYTOSIS	KEGG_ENDOCYTOSIS	KEGG_ENDOCYTOSIS	154	0.362414584093033	1.70343827231462	0.000129066934204339	0.00106773554659953	0.000599018785541671	2935	tags=34%, list=21%, signal=27%	9922/11031/51100/80223/5337/409/3480/9815/79720/30845/2060/83737/27243/9525/5868/26052/10254/55048/1601/1785/3303/7251/5590/23550/867/3304/10938/80230/6714/9146/1950/8394/92421/2321/4914/3133/160/128866/51510/30011/29924/30846/1173/1956/998/5878/2065/2066/11059/64750/2870/6455
KEGG_RENAL_CELL_CARCINOMA	KEGG_RENAL_CELL_CARCINOMA	KEGG_RENAL_CELL_CARCINOMA	65	0.47702523866949	1.93694802671746	0.000157411202570684	0.00124560168990715	0.000698804880977408	2603	tags=43%, list=19%, signal=35%	1387/5058/673/54583/5894/5293/5062/7039/5594/2034/2885/5595/3091/23533/5906/6655/1398/5294/5781/2889/2033/2549/5063/3725/5291/8503/998/3845
KEGG_JAK_STAT_SIGNALING_PATHWAY	KEGG_JAK_STAT_SIGNALING_PATHWAY	KEGG_JAK_STAT_SIGNALING_PATHWAY	147	0.359367019899126	1.68157477544826	0.000249857579623708	0.00189475331214645	0.00106299057997806	2293	tags=29%, list=17%, signal=25%	1387/6774/3717/6777/3454/4352/6776/3570/1438/2057/8554/1441/5293/2885/3597/3718/3455/3600/3953/10254/23533/6655/3459/867/58985/3460/598/3440/5294/5781/51588/2033/5008/6772/7297/3574/3447/2690/9021/5291/8503/64109/6778
KEGG_FC_EPSILON_RI_SIGNALING_PATHWAY	KEGG_FC_EPSILON_RI_SIGNALING_PATHWAY	KEGG_FC_EPSILON_RI_SIGNALING_PATHWAY	74	0.435369601430631	1.80141221199939	0.000331417360475482	0.00241271838426151	0.00135357827225776	1302	tags=27%, list=9%, signal=25%	1432/10451/6416/5170/5336/4067/5894/5580/5293/5594/7409/2885/3635/6850/9846/5595/23533/5606/6655/5294
KEGG_ASTHMA	KEGG_ASTHMA	KEGG_ASTHMA	29	-0.590548	-1.9363	0.000470892551972598	0.00324459608586586	0.00182027657795829	2224	tags=45%, list=16%, signal=38%	3125/3117/7124/3122/3115/3111/3112/3119/958/3109/3113/959/3108
KEGG_RNA_POLYMERASE	KEGG_RNA_POLYMERASE	KEGG_RNA_POLYMERASE	27	-0.5838	-1.88013	0.000497245697568375	0.00324459608586586	0.00182027657795829	2732	tags=59%, list=20%, signal=48%	548644/51728/661/10621/5433/84172/5432/11128/5438/5435/9533/84265/5436/5441/64425/5437
KEGG_INTESTINAL_IMMUNE_NETWORK_FOR_IGA_PRODUCTION	KEGG_INTESTINAL_IMMUNE_NETWORK_FOR_IGA_PRODUCTION	KEGG_INTESTINAL_IMMUNE_NETWORK_FOR_IGA_PRODUCTION	47	-0.508401	-1.85652	0.000499168628594747	0.00324459608586586	0.00182027657795829	2777	tags=45%, list=20%, signal=36%	608/3125/3569/3117/942/23495/3122/3676/3115/3111/23308/3112/3119/29851/958/115650/3109/3695/3113/959/3108
KEGG_GRAFT_VERSUS_HOST_DISEASE	KEGG_GRAFT_VERSUS_HOST_DISEASE	KEGG_GRAFT_VERSUS_HOST_DISEASE	38	-0.537838	-1.86396	0.000769648847580151	0.0047904869496208	0.00268754906948073	3726	tags=55%, list=27%, signal=40%	3458/3804/3821/941/5551/3802/3125/3569/3117/942/3002/7124/3122/3115/3111/3112/3119/356/3109/3113/3108
KEGG_VALINE_LEUCINE_AND_ISOLEUCINE_DEGRADATION	KEGG_VALINE_LEUCINE_AND_ISOLEUCINE_DEGRADATION	KEGG_VALINE_LEUCINE_AND_ISOLEUCINE_DEGRADATION	41	-0.514995	-1.82131	0.000789640705981451	0.0047904869496208	0.00268754906948073	3284	tags=54%, list=24%, signal=41%	4329/3030/224/5096/3155/64087/219/26275/3712/35/10449/36/34/1892/587/1629/594/84693/5019/11112/56922/38
KEGG_TYPE_II_DIABETES_MELLITUS	KEGG_TYPE_II_DIABETES_MELLITUS	KEGG_TYPE_II_DIABETES_MELLITUS	44	0.49017169752654	1.84118955098356	0.000942156889274248	0.00553137270477139	0.00310319926178615	3441	tags=52%, list=25%, signal=39%	8660/777/5580/5293/774/5594/3101/5595/23533/5590/3099/5294/776/9021/6517/5291/8503/389692/9370/3643/5290/3098/775
KEGG_MAPK_SIGNALING_PATHWAY	KEGG_MAPK_SIGNALING_PATHWAY	KEGG_MAPK_SIGNALING_PATHWAY	250	0.300167576229817	1.49022057442852	0.0011694449481716	0.00665121814272598	0.00373145263067912	2475	tags=26%, list=18%, signal=21%	5058/6788/1432/673/6416/1647/5534/1843/1147/57551/2353/1649/7850/409/9252/115727/5894/777/10746/6195/5494/8569/5062/7046/9261/5566/774/5594/2885/10912/5595/3553/5801/3303/5906/5606/6655/2872/1398/6789/8517/3304/4763/4616/3554/4296/7132/1950/8398/4914/5609/776/3725/9965/5536/4908/4215/2316/1956/4342/4149/4208/2258/998
KEGG_ADHERENS_JUNCTION	KEGG_ADHERENS_JUNCTION	KEGG_ADHERENS_JUNCTION	67	0.425307969281167	1.74194832120786	0.00138685368784739	0.0074237462114184	0.00416485472821044	2633	tags=39%, list=19%, signal=32%	1387/1495/7414/87/3480/4087/8826/7454/7046/10163/5594/81/5595/10810/1457/6714/2033/5792/6934/60/1499/9855/1956/83439/998/10580
KEGG_ALZHEIMERS_DISEASE	KEGG_ALZHEIMERS_DISEASE	KEGG_ALZHEIMERS_DISEASE	131	-0.368653	-1.59888	0.0013696606745313	0.0074237462114184	0.00416485472821044	1937	tags=29%, list=14%, signal=25%	1347/4697/6389/7124/3416/808/1327/4716/374291/4694/1337/1345/4701/1350/801/4704/4717/4706/4696/54205/4711/1329/7388/1351/4713/4708/1537/4723/4702/3710/7386/4722/4725/9377/4714/4724/5533/4728
KEGG_MISMATCH_REPAIR	KEGG_MISMATCH_REPAIR	KEGG_MISMATCH_REPAIR	22	-0.608566	-1.87582	0.00158677086053107	0.0080697560070955	0.00452727780617851	3730	tags=68%, list=27%, signal=50%	5424/5981/6117/29935/27030/5985/5111/5983/5984/3978/4292/6119/6742/5395/6118
KEGG_NUCLEOTIDE_EXCISION_REPAIR	KEGG_NUCLEOTIDE_EXCISION_REPAIR	KEGG_NUCLEOTIDE_EXCISION_REPAIR	43	-0.503779	-1.79551	0.00159621547393098	0.0080697560070955	0.00452727780617851	3791	tags=63%, list=28%, signal=46%	1161/5424/5981/7507/6117/5427/9978/29935/2072/2068/4331/5985/2968/2073/5111/2071/1069/5983/5426/5984/56655/3978/6119/2967/6118/404672/54107
KEGG_ACUTE_MYELOID_LEUKEMIA	KEGG_ACUTE_MYELOID_LEUKEMIA	KEGG_ACUTE_MYELOID_LEUKEMIA	55	0.451490901203262	1.76227949559257	0.00188196624417081	0.00925723936321859	0.00519347725987394	3343	tags=53%, list=24%, signal=40%	6774/673/6777/1147/6776/5894/5293/5594/2885/5595/23533/2322/6655/8517/6688/5294/8900/1050/6934/5914/5291/8503/83439/3845/5371/3815/3728/5290/861
KEGG_AUTOIMMUNE_THYROID_DISEASE	KEGG_AUTOIMMUNE_THYROID_DISEASE	KEGG_AUTOIMMUNE_THYROID_DISEASE	50	-0.469305	-1.73569	0.00231141046643216	0.0110704396023856	0.00621071510370968	2224	tags=32%, list=16%, signal=27%	3117/942/3002/3122/3115/3111/3112/3448/3119/1493/958/356/3109/3113/959/3108
KEGG_PROTEIN_EXPORT	KEGG_PROTEIN_EXPORT	KEGG_PROTEIN_EXPORT	18	-0.633691	-1.87265	0.00252947147613408	0.011804200221959	0.00662236796720664	2985	tags=61%, list=22%, signal=48%	6730/29927/6726/83943/6731/6727/58477/5018/23480/10952/28972
KEGG_PPAR_SIGNALING_PATHWAY	KEGG_PPAR_SIGNALING_PATHWAY	KEGG_PPAR_SIGNALING_PATHWAY	67	0.404428501729053	1.65643157551511	0.00265973950010387	0.0121018147254726	0.00678933503973882	4224	tags=48%, list=31%, signal=33%	51/5170/2710/6256/2173/4023/2712/2180/1374/2181/6258/7316/1593/345/30/10580/2167/2168/51129/6257/9370/10999/9415/2182/116519/5360/2169/4973/11001/4312/5105/1579
KEGG_LYSOSOME	KEGG_LYSOSOME	KEGG_LYSOSOME	115	0.349398696862022	1.55887898963987	0.00273555155236336	0.0121431800617105	0.00681254173502557	3279	tags=38%, list=24%, signal=29%	3482/3920/2548/22901/3423/6272/6556/1520/410/164/1522/535/1509/57192/2799/537/10239/527/11154/7805/1200/411/4126/968/9114/2720/2717/23163/967/533/1201/5660/4758/2588/10312/51606/3916/950/10053/26503/1514/8546/26985/9583
KEGG_ENDOMETRIAL_CANCER	KEGG_ENDOMETRIAL_CANCER	KEGG_ENDOMETRIAL_CANCER	50	0.448395775119317	1.72126294973343	0.0029218171295254	0.0126163170465996	0.00707798006662905	2603	tags=46%, list=19%, signal=37%	5728/673/2932/5170/1495/5894/5293/5594/2885/5595/23533/6655/5294/10297/1950/6934/1499/324/5291/8503/1956/83439/3845
KEGG_NOD_LIKE_RECEPTOR_SIGNALING_PATHWAY	KEGG_NOD_LIKE_RECEPTOR_SIGNALING_PATHWAY	KEGG_NOD_LIKE_RECEPTOR_SIGNALING_PATHWAY	53	0.439306793586458	1.69986861581575	0.00298077820331749	0.0126163170465996	0.00707798006662905	1774	tags=32%, list=13%, signal=28%	1432/1147/84674/22900/329/5594/838/5595/3553/22861/4671/8517/4210/7128/9051/257397/114548
KEGG_B_CELL_RECEPTOR_SIGNALING_PATHWAY	KEGG_B_CELL_RECEPTOR_SIGNALING_PATHWAY	KEGG_B_CELL_RECEPTOR_SIGNALING_PATHWAY	70	0.399802310254225	1.64701753115542	0.00341471961566414	0.0138106437789083	0.00774801877706249	1460	tags=30%, list=11%, signal=27%	10451/2932/5336/5534/1147/2353/11025/4067/5894/5293/5594/7409/2885/3635/6850/5595/23533/6655/8517/5294/10725
KEGG_GNRH_SIGNALING_PATHWAY	KEGG_GNRH_SIGNALING_PATHWAY	KEGG_GNRH_SIGNALING_PATHWAY	96	0.359554374923418	1.54568866323643	0.00339551258079976	0.0138106437789083	0.00774801877706249	2603	tags=34%, list=19%, signal=28%	3709/1432/6416/196883/818/5337/5894/10746/5580/2185/5566/5594/2885/2776/5595/5606/6655/112/6714/8398/108/5330/5609/776/3725/4313/4215/107/1956/1839/998/5332/3845
KEGG_PROPANOATE_METABOLISM	KEGG_PROPANOATE_METABOLISM	KEGG_PROPANOATE_METABOLISM	30	-0.545957	-1.7975	0.00395620290006593	0.0156528027785217	0.008781503004723	3530	tags=60%, list=26%, signal=45%	5095/4329/3030/224/5096/219/26275/32/8803/8801/84532/34/1892/23417/8802/84693/3945/38
KEGG_PANCREATIC_CANCER	KEGG_PANCREATIC_CANCER	KEGG_PANCREATIC_CANCER	69	0.396550548975749	1.62391903008571	0.00421734635958771	0.0163310007967013	0.00916198425263176	2603	tags=38%, list=19%, signal=31%	6774/1871/673/10928/1147/5337/5899/4087/5894/5293/7039/7046/5594/5595/23533/8517/598/5294/1950/6772/5291/8503/1956/998/1870/3845
KEGG_CHRONIC_MYELOID_LEUKEMIA	KEGG_CHRONIC_MYELOID_LEUKEMIA	KEGG_CHRONIC_MYELOID_LEUKEMIA	69	0.393082126642636	1.60972	0.0050858462818307	0.0192838338186081	0.0108185765205609	1344	tags=30%, list=10%, signal=28%	1871/673/6777/1147/6776/5894/5293/7046/5594/2885/9846/5595/23533/6655/1398/6464/867/8517/598/5294/5781
KEGG_LEISHMANIA_INFECTION	KEGG_LEISHMANIA_INFECTION	KEGG_LEISHMANIA_INFECTION	67	0.385567403173999	1.57918153240014	0.00534574734010378	0.0198556329775283	0.0111393661007533	2011	tags=31%, list=15%, signal=27%	1432/7099/7097/3717/1378/2353/3684/4615/2209/2212/5743/5594/5595/3553/3459/3460/4689/4688/6772/3689/3725
KEGG_N_GLYCAN_BIOSYNTHESIS	KEGG_N_GLYCAN_BIOSYNTHESIS	KEGG_N_GLYCAN_BIOSYNTHESIS	44	-0.468608	-1.68071	0.00566458968824452	0.0202148102600099	0.0113408709960726	2321	tags=45%, list=17%, signal=38%	6184/8813/10905/29880/8703/56052/199857/2530/79053/1798/3703/11253/57134/54344/1650/1603/57171/79796/10195/6480
KEGG_INSULIN_SIGNALING_PATHWAY	KEGG_INSULIN_SIGNALING_PATHWAY	KEGG_INSULIN_SIGNALING_PATHWAY	128	0.318718992201356	1.44523559154877	0.00560745943161843	0.0202148102600099	0.0113408709960726	1514	tags=23%, list=11%, signal=21%	8660/673/2932/5170/5894/5509/5836/5293/8569/5566/5594/2885/3635/3101/5595/2319/23533/6655/2872/5590/1398/6464/5562/5257/867/3099/10211/5294/2889/5792
KEGG_CITRATE_CYCLE_TCA_CYCLE	KEGG_CITRATE_CYCLE_TCA_CYCLE	KEGG_CITRATE_CYCLE_TCA_CYCLE	30	-0.529593	-1.74362	0.00608386733859913	0.0209997742761111	0.0117812498830698	2916	tags=50%, list=21%, signal=39%	3421/1431/6392/2271/8803/1737/3420/6389/8801/3418/8802/5160/4191/5162/4190
KEGG_PRIMARY_IMMUNODEFICIENCY	KEGG_PRIMARY_IMMUNODEFICIENCY	KEGG_PRIMARY_IMMUNODEFICIENCY	35	-0.491852	-1.67125	0.00612927915916899	0.0209997742761111	0.0117812498830698	1880	tags=40%, list=14%, signal=35%	7535/23495/916/100/3932/930/29851/958/115650/926/925/959/3575/915
KEGG_PROTEASOME	KEGG_PROTEASOME	KEGG_PROTEASOME	41	-0.464228	-1.64177	0.00634608563289071	0.0209997742761111	0.0117812498830698	2543	tags=44%, list=18%, signal=36%	5683/9861/5692/5684/5709/5693/5685/5721/5705/5682/5690/10213/5701/5694/5714/5695/5689/5686
KEGG_RNA_DEGRADATION	KEGG_RNA_DEGRADATION	KEGG_RNA_DEGRADATION	46	-0.447315	-1.62813	0.00630315334491645	0.0209997742761111	0.0117812498830698	1574	tags=28%, list=11%, signal=25%	118460/51010/196513/28960/2027/11340/51690/23404/56915/25804/51013/57819/23016
KEGG_PEROXISOME	KEGG_PEROXISOME	KEGG_PEROXISOME	69	-0.407165	-1.60282	0.00704305551299969	0.022889930417249	0.0128416613676874	3091	tags=41%, list=22%, signal=32%	55670/8443/3155/8504/8528/9409/5195/8310/26063/54677/5191/10005/10478/5189/3418/5827/196743/23417/1891/8799/10654/2053/10901/373156/5830/5052/4358/6647
KEGG_DORSO_VENTRAL_AXIS_FORMATION	KEGG_DORSO_VENTRAL_AXIS_FORMATION	KEGG_DORSO_VENTRAL_AXIS_FORMATION	23	0.531315474640981	1.72782127754547	0.00821639532083379	0.026234806112136	0.0147181966042637	1252	tags=39%, list=9%, signal=36%	4853/2114/5594/2885/2120/5595/6655/4851/56907
KEGG_NON_SMALL_CELL_LUNG_CANCER	KEGG_NON_SMALL_CELL_LUNG_CANCER	KEGG_NON_SMALL_CELL_LUNG_CANCER	51	0.412449845833592	1.58759049968052	0.00875227473050999	0.0274640344991865	0.0154078157687744	2897	tags=49%, list=21%, signal=39%	1871/673/5170/5336/6256/5894/5293/7039/5594/2885/5595/23533/6655/6789/5294/1950/5915/6258/5291/8503/1956/1870/3845/1869/6257
KEGG_ADIPOCYTOKINE_SIGNALING_PATHWAY	KEGG_ADIPOCYTOKINE_SIGNALING_PATHWAY	KEGG_ADIPOCYTOKINE_SIGNALING_PATHWAY	64	0.38339236575423	1.55212681334107	0.00956304306237074	0.0294995565652792	0.0165497801436211	2204	tags=31%, list=16%, signal=26%	8660/6774/3717/1147/6256/10645/3953/5562/51094/8517/7133/2180/5781/6794/7132/1374/2181/6258/9021/6517
KEGG_BASE_EXCISION_REPAIR	KEGG_BASE_EXCISION_REPAIR	KEGG_BASE_EXCISION_REPAIR	31	-0.501723	-1.65699	0.00980477180472189	0.0297411411409897	0.0166853134220706	3730	tags=58%, list=27%, signal=42%	5424/252969/5427/10039/55247/4350/142/27301/5111/2237/5426/56655/4968/3978/10038/4913/328/54107
KEGG_PROSTATE_CANCER	KEGG_PROSTATE_CANCER	KEGG_PROSTATE_CANCER	85	0.35510105749645	1.49564443947824	0.0107461104876408	0.0320621657172233	0.0179874498240062	2603	tags=33%, list=19%, signal=27%	1387/5728/1871/673/2932/5170/1147/3480/5894/5293/7039/5594/2885/5595/23533/6655/8517/5294/2033/1950/6934/1499/5291/8503/1956/83439/1870/3845
KEGG_NEUROACTIVE_LIGAND_RECEPTOR_INTERACTION	KEGG_NEUROACTIVE_LIGAND_RECEPTOR_INTERACTION	KEGG_NEUROACTIVE_LIGAND_RECEPTOR_INTERACTION	246	0.269876873086689	1.3376362467069	0.0110082558809105	0.0323145575858985	0.0181290461875775	3518	tags=28%, list=26%, signal=21%	728/5724/146/5023/57053/1241/719/2357/2150/4987/3274/3362/9287/1135/10800/3953/623/2912/9002/186/2902/5021/3352/152/5026/140/10886/624/4887/2901/2834/148/4889/4544/2690/1812/7442/1813/1136/1141/5024/1139/3360/2555/2587/2892/6344/3354/3269/2898/3363/6755/2905/2832/5027/2560/2564/554/155/134/4985/116444/1134/1142/147/5737/7252/2689
KEGG_CARDIAC_MUSCLE_CONTRACTION	KEGG_CARDIAC_MUSCLE_CONTRACTION	KEGG_CARDIAC_MUSCLE_CONTRACTION	66	-0.390174	-1.52408	0.0115774873559461	0.0334460745838444	0.0187638475108901	1937	tags=26%, list=14%, signal=22%	1347/476/1327/9254/7169/1337/1345/784/783/1350/486/1329/7388/1351/1537/7386/9377
KEGG_TYPE_I_DIABETES_MELLITUS	KEGG_TYPE_I_DIABETES_MELLITUS	KEGG_TYPE_I_DIABETES_MELLITUS	41	-0.441175	-1.56025	0.0128856648058688	0.0366436092916894	0.0205577218119946	3726	tags=49%, list=27%, signal=36%	3458/3592/3593/941/5551/3125/3117/942/3002/7124/3122/3115/3111/3112/3119/4049/356/3109/3113/3108
KEGG_AXON_GUIDANCE	KEGG_AXON_GUIDANCE	KEGG_AXON_GUIDANCE	123	0.314979808321803	1.42106843139551	0.0138138019926296	0.0386786455793628	0.0216994136564384	3821	tags=39%, list=28%, signal=28%	5058/10154/2047/2932/22885/5534/64218/2773/5062/2050/5594/10507/5595/3897/6093/23365/57522/10725/3985/2242/8440/5063/9901/56896/2049/10509/998/2771/1946/3845/5365/57715/9723/80031/5530/5881/5535/5362/3983/219699/387/57689/137970/285220/56924/1945/10501/1948
KEGG_NOTCH_SIGNALING_PATHWAY	KEGG_NOTCH_SIGNALING_PATHWAY	KEGG_NOTCH_SIGNALING_PATHWAY	41	0.421542901348861	1.56242781863313	0.0167609883251738	0.0462196950785095	0.0259300776322465	1831	tags=34%, list=13%, signal=30%	1387/8650/4853/55534/182/113878/151636/4851/1857/6868/3516/2033/171558/9612
KEGG_NATURAL_KILLER_CELL_MEDIATED_CYTOTOXICITY	KEGG_NATURAL_KILLER_CELL_MEDIATED_CYTOTOXICITY	KEGG_NATURAL_KILLER_CELL_MEDIATED_CYTOTOXICITY	129	0.299298240323524	1.35661798159522	0.0178539712489165	0.0484988472731761	0.0272087228773747	2002	tags=25%, list=15%, signal=21%	5058/10451/8794/673/8743/5336/3454/5534/637/5894/2185/5293/5594/7409/2885/6850/3455/5595/23533/6655/3459/6464/3460/3440/5294/5781/10725/79465/7305/3133/3447/3689
KEGG_BLADDER_CANCER	KEGG_BLADDER_CANCER	KEGG_BLADDER_CANCER	38	0.436845760459927	1.58979765111906	0.0187010689344844	0.0500528609717082	0.028080552424845	2787	tags=42%, list=20%, signal=34%	1871/673/4318/23604/9252/5894/7057/5594/1612/5595/1950/4313/1956/1870/3845/1869
KEGG_GLYCOSPHINGOLIPID_BIOSYNTHESIS_LACTO_AND_NEOLACTO_SERIES	KEGG_GLYCOSPHINGOLIPID_BIOSYNTHESIS_LACTO_AND_NEOLACTO_SERIES	KEGG_GLYCOSPHINGOLIPID_BIOSYNTHESIS_LACTO_AND_NEOLACTO_SERIES	24	0.487303026750479	1.58218	0.0218247613171243	0.0575667617350235	0.0322959854730901	3600	tags=54%, list=26%, signal=40%	2529/2683/6484/10402/84002/8708/79369/2528/8704/2525/2651/10690/2523
KEGG_CALCIUM_SIGNALING_PATHWAY	KEGG_CALCIUM_SIGNALING_PATHWAY	KEGG_CALCIUM_SIGNALING_PATHWAY	169	0.279212455494638	1.32728052415406	0.024616614423005	0.0640031974998129	0.0359069413388193	3125	tags=31%, list=23%, signal=25%	3709/5724/146/5023/5336/5534/196883/818/777/2185/3274/5566/774/2776/3362/683/10800/623/4638/5257/2902/5021/5026/8877/624/6543/9630/108/6546/5330/776/148/7125/1812/107/4842/5024/1139/1956/3360/5332/2065/2066/3269/3363/2905/5256/5027/83447/3708/5530/155/5260
KEGG_AMINOACYL_TRNA_BIOSYNTHESIS	KEGG_AMINOACYL_TRNA_BIOSYNTHESIS	KEGG_AMINOACYL_TRNA_BIOSYNTHESIS	13	-0.617314	-1.64736	0.0250778464922664	0.0642840572055281	0.0360645086693824	4711	tags=85%, list=34%, signal=56%	23438/51067/10056/25973/92935/55699/55157/23395/10667/54938/79731
KEGG_APOPTOSIS	KEGG_APOPTOSIS	KEGG_APOPTOSIS	80	0.340543077588665	1.42592783551793	0.0270901414291755	0.0684778575015271	0.0384173058279244	1562	tags=26%, list=11%, signal=23%	8794/8743/11213/5534/1147/4615/637/317/5293/5566/329/8837/3553/23533/3556/8517/598/5294/8737/3554/7132
KEGG_BUTANOATE_METABOLISM	KEGG_BUTANOATE_METABOLISM	KEGG_BUTANOATE_METABOLISM	28	-0.46964	-1.52727	0.028240586506554	0.0699025526384658	0.0392165853437315	3281	tags=43%, list=24%, signal=33%	3030/224/6296/56898/3155/219/35/1892/5160/5019/5162/38
KEGG_ALDOSTERONE_REGULATED_SODIUM_REABSORPTION	KEGG_ALDOSTERONE_REGULATED_SODIUM_REABSORPTION	KEGG_ALDOSTERONE_REGULATED_SODIUM_REABSORPTION	39	0.414488837624653	1.5093987876826	0.0284219170068487	0.0699025526384658	0.0392165853437315	3319	tags=41%, list=24%, signal=31%	8660/5170/5293/5594/482/5595/23533/5294/3291/478/5291/8503/3845/3290/3643/5290
KEGG_OLFACTORY_TRANSDUCTION	KEGG_OLFACTORY_TRANSDUCTION	KEGG_OLFACTORY_TRANSDUCTION	373	0.231460406181921	1.19742046137899	0.0311309525933728	0.0755444449599179	0.0423817880920303	5278	tags=42%, list=38%, signal=27%	818/409/5566/393046/7932/4991/390445/343171/1262/391192/150681/81285/403257/81697/219484/121364/26212/119774/26740/390264/127077/130075/390155/219957/442361/2978/390066/392138/120065/127064/390077/390201/219874/26476/219453/9635/138805/1179/219959/79290/219983/4992/390078/144125/135941/390081/390197/81050/81469/158131/26692/390648/219956/219469/120793/135924/346517/26245/138804/81328/283365/5592/…
KEGG_GLIOMA	KEGG_GLIOMA	KEGG_GLIOMA	61	0.358407526966859	1.42991714049367	0.0334915883988313	0.0802035406393065	0.044995624303139	1302	tags=26%, list=9%, signal=24%	5728/1871/673/5336/818/3480/5894/5293/7039/5594/2885/5595/23533/6655/6464/5294
KEGG_LONG_TERM_DEPRESSION	KEGG_LONG_TERM_DEPRESSION	KEGG_LONG_TERM_DEPRESSION	63	0.34818100737884	1.39837158439879	0.0347485500773163	0.082132936546384	0.0460780499999956	3293	tags=35%, list=24%, signal=27%	3709/673/3480/4067/5894/2773/5594/2776/5595/8398/5330/4842/5332/2771/3845/2768/2892/2775/3708/2781/5592/50487
KEGG_CELL_ADHESION_MOLECULES_CAMS	KEGG_CELL_ADHESION_MOLECULES_CAMS	KEGG_CELL_ADHESION_MOLECULES_CAMS	121	-0.312214	-1.34069	0.0352374856848675	0.0822207999313576	0.046127342934307	2231	tags=26%, list=16%, signal=22%	9074/3117/9672/942/24146/5797/3122/3676/3115/3111/23308/3112/3119/1493/8506/5133/4267/29851/26047/4897/958/3655/3109/926/925/3695/3113/959/3108/923/914/3384
KEGG_GAP_JUNCTION	KEGG_GAP_JUNCTION	KEGG_GAP_JUNCTION	74	0.332757406545587	1.37683764280905	0.0361817804410001	0.0833554941805319	0.0467639267525251	2603	tags=34%, list=19%, signal=28%	3709/196883/1453/5894/10746/2773/5566/5594/2885/2776/5595/6655/112/6714/1950/108/5330/1812/1813/107/1956/5332/2771/7280/3845
KEGG_PANTOTHENATE_AND_COA_BIOSYNTHESIS	KEGG_PANTOTHENATE_AND_COA_BIOSYNTHESIS	KEGG_PANTOTHENATE_AND_COA_BIOSYNTHESIS	16	0.536011343674059	1.5489472456346	0.040732746898804	0.0926669991947792	0.0519878480155788	1782	tags=38%, list=13%, signal=33%	586/80025/8876/1806/60490/79646
KEGG_T_CELL_RECEPTOR_SIGNALING_PATHWAY	KEGG_T_CELL_RECEPTOR_SIGNALING_PATHWAY	KEGG_T_CELL_RECEPTOR_SIGNALING_PATHWAY	102	-0.317402	-1.32631	0.0437062937062937	0.0982042648709315	0.0550943533399674	1352	tags=25%, list=10%, signal=22%	917/1493/5133/868/916/3932/5335/10892/29851/27040/4690/10125/926/925/919/959/84433/10000/3265/3702/2534/915/5588/5533/1019
KEGG_STARCH_AND_SUCROSE_METABOLISM	KEGG_STARCH_AND_SUCROSE_METABOLISM	KEGG_STARCH_AND_SUCROSE_METABOLISM	50	0.365209885819791	1.40193614708058	0.04698331424649	0.101797180867395	0.0571100436329516	1884	tags=20%, list=14%, signal=17%	2548/55276/5836/2632/3101/3099/279/7360/5236/80146
KEGG_CELL_CYCLE	KEGG_CELL_CYCLE	KEGG_CELL_CYCLE	112	-0.314841	-1.34099	0.0464716006884682	0.101797180867395	0.0571100436329516	2282	tags=30%, list=17%, signal=26%	4176/4173/4085/4609/8454/246184/5111/3066/8317/7465/25847/9232/64682/898/3065/1874/10459/10393/8379/1017/7043/5934/1021/4172/1875/5933/994/8881/894/11200/4088/10971/51433/1019
KEGG_VASCULAR_SMOOTH_MUSCLE_CONTRACTION	KEGG_VASCULAR_SMOOTH_MUSCLE_CONTRACTION	KEGG_VASCULAR_SMOOTH_MUSCLE_CONTRACTION	106	0.293904653361109	1.28806922378356	0.0464514540058257	0.101797180867395	0.0571100436329516	2100	tags=25%, list=15%, signal=21%	3709/673/146/196883/10398/5894/5580/5566/5594/2776/5595/4660/3778/6093/23365/4638/112/8398/4637/4881/108/10242/5330/776/148/59
KEGG_BASAL_TRANSCRIPTION_FACTORS	KEGG_BASAL_TRANSCRIPTION_FACTORS	KEGG_BASAL_TRANSCRIPTION_FACTORS	32	-0.436134	-1.45398	0.0499372862216895	0.106924542262912	0.0599865853065497	2426	tags=50%, list=18%, signal=41%	2963/2965/9569/2957/27097/6880/11037/6878/2968/6908/6881/10629/2961/6873/2967/2958
KEGG_MTOR_SIGNALING_PATHWAY	KEGG_MTOR_SIGNALING_PATHWAY	KEGG_MTOR_SIGNALING_PATHWAY	46	0.372312519031208	1.40135319164431	0.0514979483825297	0.108984030297912	0.0611419950196497	2520	tags=35%, list=18%, signal=29%	673/5170/51719/6195/5293/5594/5595/3091/23533/5562/5294/6794/253260/5291/8503/7249
KEGG_INOSITOL_PHOSPHATE_METABOLISM	KEGG_INOSITOL_PHOSPHATE_METABOLISM	KEGG_INOSITOL_PHOSPHATE_METABOLISM	46	0.361308617168091	1.35993542509554	0.0574712643678161	0.120227242700489	0.0674496387619862	2492	tags=33%, list=18%, signal=27%	3705/5728/3632/5336/10423/5293/8871/5294/8394/5330/3613/253430/5291/8867/5332
KEGG_PHOSPHATIDYLINOSITOL_SIGNALING_SYSTEM	KEGG_PHOSPHATIDYLINOSITOL_SIGNALING_SYSTEM	KEGG_PHOSPHATIDYLINOSITOL_SIGNALING_SYSTEM	67	0.327970882156398	1.34328150150348	0.0623556581986143	0.128962838547134	0.072350464656287	2795	tags=33%, list=20%, signal=26%	3709/3705/5728/3632/5336/10423/5293/3635/8760/23533/8871/5294/8394/5330/3613/5291/8503/8867/8527/5332/3631/160851
KEGG_HEMATOPOIETIC_CELL_LINEAGE	KEGG_HEMATOPOIETIC_CELL_LINEAGE	KEGG_HEMATOPOIETIC_CELL_LINEAGE	85	0.309734739956666	1.30456677542859	0.0633802816901408	0.129609115366355	0.0727130375392509	1505	tags=25%, list=11%, signal=22%	4311/1378/3570/1438/3684/2057/7850/290/3674/1441/3690/3678/2209/1604/3553/966/2322/2811/2993/3554/2815
KEGG_GLYOXYLATE_AND_DICARBOXYLATE_METABOLISM	KEGG_GLYOXYLATE_AND_DICARBOXYLATE_METABOLISM	KEGG_GLYOXYLATE_AND_DICARBOXYLATE_METABOLISM	15	-0.527292	-1.47095	0.0720887245841035	0.145539906103286	0.0816504967728096	2564	tags=53%, list=19%, signal=43%	441024/4522/132158/1431/25902/9380/4191/4190
KEGG_VEGF_SIGNALING_PATHWAY	KEGG_VEGF_SIGNALING_PATHWAY	KEGG_VEGF_SIGNALING_PATHWAY	69	0.322284070185348	1.31978945942519	0.0727699530516432	0.145539906103286	0.0816504967728096	1673	tags=23%, list=12%, signal=20%	1432/5336/5534/5894/5293/5743/9261/5594/5829/5595/23533/5294/6714/10725/8877/8398
KEGG_GALACTOSE_METABOLISM	KEGG_GALACTOSE_METABOLISM	KEGG_GALACTOSE_METABOLISM	25	0.424011900660774	1.39622553655776	0.0770975056689342	0.152518978605935	0.0855658815776501	3621	tags=56%, list=26%, signal=41%	2548/55276/2683/3101/3099/7360/5236/2720/2717/8972/8704/5211/3098/2582
KEGG_MELANOGENESIS	KEGG_MELANOGENESIS	KEGG_MELANOGENESIS	99	0.286760316745352	1.24716239465677	0.0790067720090293	0.154615403286488	0.0867420134111584	2642	tags=31%, list=19%, signal=25%	1387/2932/196883/818/5894/2773/5566/5594/2776/5595/112/1857/2033/6934/81029/1499/108/5330/8324/7472/8321/107/83439/7475/5332/2771/54361/1638/7477/3845/2775
KEGG_SMALL_CELL_LUNG_CANCER	KEGG_SMALL_CELL_LUNG_CANCER	KEGG_SMALL_CELL_LUNG_CANCER	81	0.302404551388575	1.26738275392006	0.0815850815850816	0.157962604771115	0.0886198534574794	1396	tags=21%, list=10%, signal=19%	5728/1871/1147/6256/8554/1030/3674/317/5293/5743/329/23533/8517/598/5294/51588/1284
KEGG_SPHINGOLIPID_METABOLISM	KEGG_SPHINGOLIPID_METABOLISM	KEGG_SPHINGOLIPID_METABOLISM	28	0.400446535069344	1.34570879823687	0.0857787810383747	0.164334085778781	0.0921943685398598	1707	tags=25%, list=12%, signal=22%	9517/410/8560/8879/8877/2720/2717
KEGG_NITROGEN_METABOLISM	KEGG_NITROGEN_METABOLISM	KEGG_NITROGEN_METABOLISM	23	0.432078683058127	1.40510634038303	0.0905077262693157	0.169138693728858	0.0948898397437779	1978	tags=35%, list=14%, signal=30%	3034/762/2747/760/759/771/2752/767
KEGG_GLYCOSYLPHOSPHATIDYLINOSITOL_GPI_ANCHOR_BIOSYNTHESIS	KEGG_GLYCOSYLPHOSPHATIDYLINOSITOL_GPI_ANCHOR_BIOSYNTHESIS	KEGG_GLYCOSYLPHOSPHATIDYLINOSITOL_GPI_ANCHOR_BIOSYNTHESIS	23	-0.439612	-1.37269	0.0910746812386157	0.169138693728858	0.0948898397437779	3200	tags=48%, list=23%, signal=37%	8733/80235/10026/51604/9487/23556/93183/5277/5279/5283/84992
KEGG_COLORECTAL_CANCER	KEGG_COLORECTAL_CANCER	KEGG_COLORECTAL_CANCER	61	0.318920682229124	1.2723788304243	0.0909090909090909	0.169138693728858	0.0948898397437779	2603	tags=33%, list=19%, signal=27%	673/2932/2353/4087/5894/5293/7046/5594/5595/23533/5294/10297/6934/1499/324/3725/5291/8503/83439/3845
KEGG_NICOTINATE_AND_NICOTINAMIDE_METABOLISM	KEGG_NICOTINATE_AND_NICOTINAMIDE_METABOLISM	KEGG_NICOTINATE_AND_NICOTINAMIDE_METABOLISM	19	0.44809304538681	1.36284300506714	0.0969162995594714	0.178169358786099	0.0999562047556483	1848	tags=32%, list=13%, signal=27%	4837/22978/64802/683/349565/56953
KEGG_CYTOKINE_CYTOKINE_RECEPTOR_INTERACTION	KEGG_CYTOKINE_CYTOKINE_RECEPTOR_INTERACTION	KEGG_CYTOKINE_CYTOKINE_RECEPTOR_INTERACTION	242	0.232020795855117	1.15585889606213	0.10655737704918	0.193934426229508	0.108800690250216	2828	tags=25%, list=21%, signal=20%	8794/8743/3454/4352/9547/3570/1438/58191/2057/7850/3625/1441/10673/7046/3604/3597/3455/8807/3600/3953/1230/3553/5197/51330/2322/3459/3556/58985/3460/7133/3440/650/7292/3554/7132/1950/4055/5008/4804/8809/2321/5473/3574/3447/2690/6354/8600/6374/64109/10344/1956/1439/8995/3452/91/3567/6363/2921/8792/8200/3601
KEGG_RIBOFLAVIN_METABOLISM	KEGG_RIBOFLAVIN_METABOLISM	KEGG_RIBOFLAVIN_METABOLISM	14	-0.512777	-1.39218	0.108365019011407	0.195271618416595	0.109550879042277	1143	tags=21%, list=8%, signal=20%	52/80308/29085

## Sheet: CKAP4
ID	Description	setSize	enrichmentScore	NES	pvalue	p.adjust	qvalue	rank	leading_edge	core_enrichment
KEGG_RIBOSOME	KEGG_RIBOSOME	KEGG_RIBOSOME	82	-0.69404	-2.77615	9.20632490634059e-17	1.67555113295399e-14	9.30323358956523e-15	3620	tags=82%, list=26%, signal=61%	6229/6159/6122/9349/6155/140801/28998/6158/6167/9045/6227/6160/6204/6144/6128/6235/6129/6234/6181/6168/6201/6135/6170/6232/6165/6194/6130/6154/2197/6231/6218/6233/6125/6152/6228/6203/6205/6142/6139/6157/6230/6136/6217/6188/4736/11224/6141/3921/6169/6176/6161/6143/6224/6209/6156/6193/6147/6166/6124/6207/6175/6223/23521/6191/25873/6187/6146
KEGG_REGULATION_OF_ACTIN_CYTOSKELETON	KEGG_REGULATION_OF_ACTIN_CYTOSKELETON	KEGG_REGULATION_OF_ACTIN_CYTOSKELETON	193	0.433338086422202	2.08933533904644	7.53449392637513e-10	6.85638947300137e-08	3.80690219437901e-08	1769	tags=30%, list=13%, signal=26%	3684/10451/87/5058/85464/26230/4627/3690/3674/6548/8826/3693/7414/3678/54434/673/3687/10398/10788/54961/5594/10163/2258/5293/5894/5829/10297/7454/7409/6093/3985/4638/1956/929/8394/23533/5595/4478/5062/6655/60/23365/3689/81/623/89846/5294/1398/81624/1729/10109/1950/128239/5291/5063/1730/3681
KEGG_COMPLEMENT_AND_COAGULATION_CASCADES	KEGG_COMPLEMENT_AND_COAGULATION_CASCADES	KEGG_COMPLEMENT_AND_COAGULATION_CASCADES	67	0.581071794481278	2.37302361830262	1.82659693972413e-08	1.10813547676597e-06	6.15274758643918e-07	3929	tags=58%, list=29%, signal=42%	2153/2161/728/1378/5627/719/2162/7450/7035/5328/5329/1604/727/4179/5265/966/714/623/1361/722/717/2159/713/624/5624/712/5054/733/2243/710/7056/2158/3827/2160/2152/731/735/715/718
KEGG_CHEMOKINE_SIGNALING_PATHWAY	KEGG_CHEMOKINE_SIGNALING_PATHWAY	KEGG_CHEMOKINE_SIGNALING_PATHWAY	174	0.41087256648249	1.96119355005236	2.31423174179907e-07	1.05297544251858e-05	5.84648018980819e-06	2726	tags=36%, list=20%, signal=29%	6774/57580/58191/10451/3717/5580/5058/26230/196883/6777/2932/9547/2885/409/8517/4067/673/5566/2773/1147/5594/5590/108/5293/3055/5894/2787/5829/7454/2783/3718/7409/6093/2185/23533/5595/6655/5294/2931/1398/10344/6354/1230/6464/5291/9844/5473/112/5906/5197/5330/3845/408/2790/1794/2791/59345/111/998/2870/8503/2919/114
KEGG_SPLICEOSOME	KEGG_SPLICEOSOME	KEGG_SPLICEOSOME	90	-0.524806	-2.12652	3.70426323159405e-07	1.3410499873279e-05	7.44596869771419e-06	3022	tags=51%, list=22%, signal=40%	23658/10262/8449/6635/27258/22916/10915/56949/51691/10713/8175/9092/6629/51729/6632/10946/83443/10907/84844/84991/23451/6634/4116/11338/151903/27316/1655/5356/1665/26121/9129/6637/27339/6628/6626/25804/51645/57819/6631/51690/84321/9984/6636/10465/3312/6627
KEGG_FC_GAMMA_R_MEDIATED_PHAGOCYTOSIS	KEGG_FC_GAMMA_R_MEDIATED_PHAGOCYTOSIS	KEGG_FC_GAMMA_R_MEDIATED_PHAGOCYTOSIS	87	0.501253222748527	2.12204166052507	5.14265804063486e-07	1.3410499873279e-05	7.44596869771419e-06	1879	tags=39%, list=14%, signal=34%	10451/5337/5580/5058/4082/7408/2212/2209/5336/4067/6850/5594/10163/9846/5293/3055/5894/7454/10810/7409/3985/8877/8394/23533/5595/3635/1785/5294/1398/10109/5291/8398/26052/273
KEGG_LEUKOCYTE_TRANSENDOTHELIAL_MIGRATION	KEGG_LEUKOCYTE_TRANSENDOTHELIAL_MIGRATION	KEGG_LEUKOCYTE_TRANSENDOTHELIAL_MIGRATION	106	0.473998416057219	2.08508191697323	5.15788456664577e-07	1.3410499873279e-05	7.44596869771419e-06	2978	tags=44%, list=22%, signal=35%	4318/1495/1432/3684/10451/87/7408/5175/7414/5336/10398/4689/2773/6494/5293/5829/7409/6093/2185/23533/4478/1536/90952/60/4688/3689/81/5294/4313/83700/5291/1499/5906/51208/7122/58494/9080/7070/50848/29119/10411/998/8503/1365/5781/387/2771
KEGG_PARKINSONS_DISEASE	KEGG_PARKINSONS_DISEASE	KEGG_PARKINSONS_DISEASE	87	-0.523073	-2.11057	7.29117177568229e-07	1.65874157896772e-05	9.20990119033552e-06	2798	tags=46%, list=20%, signal=37%	7416/11315/1327/7326/7327/6389/1340/1347/4716/4697/1337/4729/4706/4701/1329/1345/4704/4694/4717/4702/1351/4696/4713/9377/54205/4711/4722/7388/7386/1537/1350/4723/4725/4708/4714/7419/4728/292/4724/291
KEGG_DNA_REPLICATION	KEGG_DNA_REPLICATION	KEGG_DNA_REPLICATION	31	-0.684975	-2.24838	8.46397796057025e-07	1.71160443202643e-05	9.50341385046485e-06	2334	tags=61%, list=17%, signal=51%	6117/4175/4176/5111/5426/10535/5985/5983/56655/2237/5984/3978/6118/6119/6742/246243/54107/4172/5557
KEGG_LYSOSOME	KEGG_LYSOSOME	KEGG_LYSOSOME	115	0.440060548463335	1.96156993010407	1.54462452569853e-06	2.81121663677132e-05	1.5608837312322e-05	2445	tags=38%, list=18%, signal=32%	3482/6272/6556/2548/1522/410/1520/3920/2799/164/3423/1509/537/535/2717/22901/5660/7805/9114/411/1511/10239/967/57192/4126/1200/533/2760/2720/4758/11154/51606/23163/8218/1201/4668/968/26503/527/1514/950/3916/285362/9741
KEGG_OXIDATIVE_PHOSPHORYLATION	KEGG_OXIDATIVE_PHOSPHORYLATION	KEGG_OXIDATIVE_PHOSPHORYLATION	91	-0.503646	-2.04113	3.03275990236461e-06	5.01783911118508e-05	2.78607608255505e-05	2140	tags=43%, list=16%, signal=36%	1340/9550/1347/4716/90423/4697/1337/534/4729/4706/4701/1329/1345/1352/126328/4704/4694/4717/4702/1351/4696/4713/9377/9296/4711/10063/4722/7388/7386/1537/1350/4723/4725/4708/4714/1353/5464/4728/4724
KEGG_PURINE_METABOLISM	KEGG_PURINE_METABOLISM	KEGG_PURINE_METABOLISM	142	-0.431504	-1.87427	3.96834319772238e-06	6.01865384987895e-05	3.34176269281885e-05	2682	tags=36%, list=19%, signal=29%	27115/5198/548644/5634/5147/29922/5139/10621/654364/5433/661/5432/5426/51728/4882/56655/26289/84172/1716/158/5438/5435/203/5144/100/9533/4907/204/5436/5441/5158/955/30833/471/11128/4832/2272/5471/3615/3704/6240/64425/54107/3251/5150/84265/5557/353/4830/5437/5631
KEGG_ALLOGRAFT_REJECTION	KEGG_ALLOGRAFT_REJECTION	KEGG_ALLOGRAFT_REJECTION	35	-0.628938	-2.1094	9.21445125394863e-06	0.000119787866301332	6.65103248405315e-05	3185	tags=54%, list=23%, signal=42%	3592/941/3458/7124/5551/942/3122/3115/3119/3108/3002/3109/958/3117/3113/356/3111/3112/959
KEGG_HUNTINGTONS_DISEASE	KEGG_HUNTINGTONS_DISEASE	KEGG_HUNTINGTONS_DISEASE	145	-0.420749	-1.83894	8.93394954257222e-06	0.000119787866301332	6.65103248405315e-05	2833	tags=39%, list=21%, signal=32%	10540/7416/1327/7802/161/23186/548644/3066/6389/64764/64446/1340/83544/5433/1347/4716/4697/5432/6908/55081/1337/3065/4729/4706/4701/1329/1345/4704/4694/5438/5435/4717/4702/1351/4696/4713/9377/54205/4711/5436/5441/4722/7388/7386/1537/1350/4723/4725/4708/4714/7419/4728/292/4724/5437/291/6647
KEGG_PYRIMIDINE_METABOLISM	KEGG_PYRIMIDINE_METABOLISM	KEGG_PYRIMIDINE_METABOLISM	88	-0.47457	-1.91485	2.9412003015875e-05	0.000356865636592617	0.000198144020317474	2282	tags=40%, list=17%, signal=33%	29922/10621/654364/5433/661/5432/5426/51728/1854/56655/50808/84172/790/7372/5438/5435/9533/4907/139596/5436/5441/955/30833/11128/4832/54963/3704/6240/64425/54107/84265/5557/4830/1635/5437
KEGG_ENDOCYTOSIS	KEGG_ENDOCYTOSIS	KEGG_ENDOCYTOSIS	154	0.378177885278179	1.77142481803507	4.37959196681103e-05	0.000498178586224754	0.00027660580843017	3474	tags=42%, list=25%, signal=31%	9922/51100/11031/5337/409/80223/27243/9815/10938/1601/5590/3303/2060/1956/3304/9146/79720/55048/8394/3480/10254/23550/5868/1785/6455/29924/6714/867/83737/30845/4914/1950/7251/8218/80230/26052/11059/92421/408/2065/4193/5878/2066/1173/998/11267/3133/2870/5979/2321/128866/160/23327/3815/1436/30844/9525/51510/163/64750/10015/23396/1213/3949
KEGG_FOCAL_ADHESION	KEGG_FOCAL_ADHESION	KEGG_FOCAL_ADHESION	186	0.360710934555872	1.7317600769824	5.10124751514702e-05	0.000546133557503975	0.000303232050435984	2713	tags=32%, list=20%, signal=26%	7094/10451/87/5058/7057/5728/7408/2932/3690/3674/2885/7450/3693/7414/3678/673/10398/5594/5170/5293/7059/5894/5829/7409/7791/6093/4638/1956/23533/5595/3480/5062/6655/60/81/5294/329/1398/6714/1729/1950/6464/5291/7448/5063/1499/5906/3673/1301/2889/1302/3381/7422/1284/998/3082/1282/2321/3611/8503
KEGG_NEUROTROPHIN_SIGNALING_PATHWAY	KEGG_NEUROTROPHIN_SIGNALING_PATHWAY	KEGG_NEUROTROPHIN_SIGNALING_PATHWAY	115	0.400599946338039	1.7856742929626	5.9283440930729e-05	0.000599421458299593	0.000332819317505847	2982	tags=40%, list=22%, signal=32%	11213/6272/1432/8660/5580/2932/818/2885/6195/5336/57498/673/9261/5594/5170/5293/5894/23533/5595/6655/5294/1398/397/2549/7532/4914/6464/7529/5291/9252/7533/5906/8471/3845/2889/5609/998/8503/4215/51135/581/5781/387/163688/4908/805
KEGG_TYPE_II_DIABETES_MELLITUS	KEGG_TYPE_II_DIABETES_MELLITUS	KEGG_TYPE_II_DIABETES_MELLITUS	44	0.54761708875792	2.05883337062639	6.61358445318426e-05	0.00061612305191682	0.000342092614135423	2325	tags=48%, list=17%, signal=40%	8660/777/5580/3101/5594/5590/5293/774/23533/5595/3099/5294/9021/5291/776/3643/3767/5313/8471/6517/9370
KEGG_EPITHELIAL_CELL_SIGNALING_IN_HELICOBACTER_PYLORI_INFECTION	KEGG_EPITHELIAL_CELL_SIGNALING_IN_HELICOBACTER_PYLORI_INFECTION	KEGG_EPITHELIAL_CELL_SIGNALING_IN_HELICOBACTER_PYLORI_INFECTION	62	0.48091557660696	1.91672836449648	6.78169820528828e-05	0.00061612305191682	0.000342092614135423	2877	tags=47%, list=21%, signal=37%	1432/5058/523/526/537/535/5336/8517/4067/6416/9114/1147/6868/1956/533/51382/6714/51606/83700/8992/7082/527/58494/529/1839/50848/998/2919/5781
KEGG_TOLL_LIKE_RECEPTOR_SIGNALING_PATHWAY	KEGG_TOLL_LIKE_RECEPTOR_SIGNALING_PATHWAY	KEGG_TOLL_LIKE_RECEPTOR_SIGNALING_PATHWAY	96	0.418842405818921	1.80331906778266	7.10911213750177e-05	0.00061612305191682	0.000342092614135423	2958	tags=38%, list=21%, signal=30%	1432/7099/7097/51311/4615/10333/7100/3454/8517/54472/6416/2353/1147/5594/5293/3553/3455/353376/929/23533/5595/23643/5294/3440/5291/5606/5609/8737/29110/3447/3452/8772/8503/114609/51135/51284
KEGG_ERBB_SIGNALING_PATHWAY	KEGG_ERBB_SIGNALING_PATHWAY	KEGG_ERBB_SIGNALING_PATHWAY	82	0.451077605679672	1.89629491720748	7.47704119394888e-05	0.000618555226044862	0.000343443040487604	2442	tags=41%, list=18%, signal=34%	5058/6777/2932/818/2885/7039/6776/5336/673/6416/5594/5293/5894/1956/23533/5595/5062/6655/5294/1398/6714/867/2549/1950/6464/5291/5063/3084/3845/2065/5609/2069/1839/2066
KEGG_RENAL_CELL_CARCINOMA	KEGG_RENAL_CELL_CARCINOMA	KEGG_RENAL_CELL_CARCINOMA	65	0.465972078525236	1.88476800909961	8.5853314067854e-05	0.000679361006971715	0.00037720449201437	2877	tags=45%, list=21%, signal=35%	1387/5058/54583/2885/7039/673/2034/5594/5293/5894/3091/23533/5595/5062/6655/5294/1398/2549/5291/5063/5906/3845/2889/7422/2033/998/3082/8503/5781
KEGG_PATHWAYS_IN_CANCER	KEGG_PATHWAYS_IN_CANCER	KEGG_PATHWAYS_IN_CANCER	311	0.291568925093252	1.47124320472344	0.000188209838156962	0.00142725793935696	0.000792462476450368	2963	tags=32%, list=22%, signal=26%	4318/1387/1495/6774/5337/1438/1871/10928/6256/1050/5728/6777/2932/1441/3674/54583/23604/2885/7039/6776/5336/5899/8031/8517/1030/673/1612/2034/2322/2353/1147/5594/8554/2258/5293/5894/1857/637/10297/5743/1956/3091/51588/4087/23533/5595/3480/6655/7046/5294/329/1398/867/4914/1950/4313/8900/6688/5291/6257/650/5914/1870/81029/1869/1499/5915/3673/7475/3845/598/4149/6608/8324/4193/2250/324/8321/54361/693…
KEGG_PRIMARY_IMMUNODEFICIENCY	KEGG_PRIMARY_IMMUNODEFICIENCY	KEGG_PRIMARY_IMMUNODEFICIENCY	35	-0.561816	-1.88428	0.000384104578916317	0.00279628133451079	0.00155259114004069	1741	tags=43%, list=13%, signal=38%	3561/23495/115650/7535/958/100/926/925/3932/930/916/29851/959/3575/915
KEGG_LEISHMANIA_INFECTION	KEGG_LEISHMANIA_INFECTION	KEGG_LEISHMANIA_INFECTION	67	0.442920325071448	1.80883051354971	0.000432160112111139	0.00302512078477797	0.00167965063816475	1213	tags=28%, list=9%, signal=26%	1432/3684/7099/1378/7097/3717/4615/2212/2209/3460/4689/2353/5594/3459/3553/5743/5595/4688/3689
KEGG_PROTEIN_EXPORT	KEGG_PROTEIN_EXPORT	KEGG_PROTEIN_EXPORT	18	-0.680534	-1.99045	0.000754806686383928	0.00490624346149553	0.00272411435687433	2743	tags=67%, list=20%, signal=53%	6728/11231/6731/6730/6726/83943/5018/10952/6727/58477/23480/28972
KEGG_ACUTE_MYELOID_LEUKEMIA	KEGG_ACUTE_MYELOID_LEUKEMIA	KEGG_ACUTE_MYELOID_LEUKEMIA	55	0.465895502083676	1.81784151944057	0.000751112165526682	0.00490624346149553	0.00272411435687433	1707	tags=36%, list=12%, signal=32%	6774/1050/6777/2885/6776/8517/673/2322/1147/5594/5293/5894/23533/5595/6655/5294/8900/6688/5291/5914
KEGG_RNA_POLYMERASE	KEGG_RNA_POLYMERASE	KEGG_RNA_POLYMERASE	27	-0.606456	-1.93065	0.000997940105395817	0.00586407071477245	0.00325593284336701	2525	tags=59%, list=18%, signal=48%	548644/10621/5433/661/5432/51728/84172/5438/5435/9533/5436/5441/11128/64425/84265/5437
KEGG_SPHINGOLIPID_METABOLISM	KEGG_SPHINGOLIPID_METABOLISM	KEGG_SPHINGOLIPID_METABOLISM	28	0.561703903769138	1.88164614586923	0.000998825231637066	0.00586407071477245	0.00325593284336701	1141	tags=29%, list=8%, signal=26%	410/9517/8560/2717/8879/8877/2720/4758
KEGG_GRAFT_VERSUS_HOST_DISEASE	KEGG_GRAFT_VERSUS_HOST_DISEASE	KEGG_GRAFT_VERSUS_HOST_DISEASE	38	-0.540008	-1.85137	0.000982854248405109	0.00586407071477245	0.00325593284336701	3113	tags=63%, list=23%, signal=49%	3127/3811/3125/57292/3804/3821/3802/941/3458/3569/7124/5551/942/3122/3115/3119/3108/3002/3109/3117/3113/356/3111/3112
KEGG_MISMATCH_REPAIR	KEGG_MISMATCH_REPAIR	KEGG_MISMATCH_REPAIR	22	-0.618634	-1.88643	0.00111302771103866	0.00614961357990689	0.00341447601891881	2590	tags=55%, list=19%, signal=44%	27030/6117/5111/5985/5983/4292/5984/3978/6118/5395/6119/6742
KEGG_PPAR_SIGNALING_PATHWAY	KEGG_PPAR_SIGNALING_PATHWAY	KEGG_PPAR_SIGNALING_PATHWAY	67	0.427373792286347	1.74534044255995	0.00118261799613594	0.00614961357990689	0.00341447601891881	3283	tags=39%, list=24%, signal=30%	51/6256/2710/4023/5170/2180/345/2173/4973/2167/1374/2712/30/6257/1593/11001/2181/9370/7316/948/3611/10062/6258/9415/5360/2168
KEGG_FC_EPSILON_RI_SIGNALING_PATHWAY	KEGG_FC_EPSILON_RI_SIGNALING_PATHWAY	KEGG_FC_EPSILON_RI_SIGNALING_PATHWAY	74	0.405424410851234	1.68057228235845	0.00115441980206984	0.00614961357990689	0.00341447601891881	2160	tags=34%, list=16%, signal=29%	1432/10451/5580/2885/5336/4067/6416/6850/5594/9846/5170/5293/5894/7409/23533/5595/6655/3635/5294/5291/5606/8398/3845/5609/2207
KEGG_INSULIN_SIGNALING_PATHWAY	KEGG_INSULIN_SIGNALING_PATHWAY	KEGG_INSULIN_SIGNALING_PATHWAY	128	0.351317877460613	1.59334735521172	0.0011230912204495	0.00614961357990689	0.00341447601891881	2321	tags=33%, list=17%, signal=28%	8660/5509/3101/2932/5836/2885/2319/673/8569/5566/5594/5590/5170/5293/5894/2872/10211/23533/5595/3099/6655/3635/5294/1398/867/5257/5792/9021/6464/5291/9470/5576/2203/3643/5313/8471/3845/2889/5256/6517/5571/5562
KEGG_NEUROACTIVE_LIGAND_RECEPTOR_INTERACTION	KEGG_NEUROACTIVE_LIGAND_RECEPTOR_INTERACTION	KEGG_NEUROACTIVE_LIGAND_RECEPTOR_INTERACTION	246	0.296199901613332	1.46562266365761	0.00143548102780654	0.00725715408502193	0.00402942042893063	4062	tags=34%, list=30%, signal=25%	5724/5023/1241/728/719/2357/4987/146/3274/3362/1511/140/57053/2150/9002/2912/9287/623/1139/1141/152/186/1135/2914/2834/5027/1394/3352/3953/6344/3269/1136/148/2892/10886/2901/554/2902/134864/624/1142/1812/4923/1813/10800/7442/116444/3354/5617/5026/165829/4985/2911/1134/6751/56923/147/5021/5028/7252/2832/3363/83551/6870/116443/1128/5737/23620/2905/2564/1909/4889/84539/8001/5739/2898/4544/2567/2563/…
KEGG_PYRUVATE_METABOLISM	KEGG_PYRUVATE_METABOLISM	KEGG_PYRUVATE_METABOLISM	39	-0.519263	-1.79278	0.00165086135823981	0.00808560095001598	0.004489402493936	2680	tags=44%, list=19%, signal=35%	5106/219/32/134526/1737/84264/9380/84532/5160/4191/5162/98/2739/38/3945/231/4190
KEGG_JAK_STAT_SIGNALING_PATHWAY	KEGG_JAK_STAT_SIGNALING_PATHWAY	KEGG_JAK_STAT_SIGNALING_PATHWAY	147	0.326761479639515	1.52523507217964	0.00168820239615718	0.00808560095001598	0.004489402493936	2469	tags=28%, list=18%, signal=23%	1387/6774/1438/3717/3600/6777/3570/3454/1441/2885/4352/6776/2057/5008/3460/8554/5293/3459/3718/3455/51588/23533/10254/6655/3597/7297/5294/3440/867/58985/9021/5291/1439/3953/59067/598/3447/3574/3588/3452/2033
KEGG_BLADDER_CANCER	KEGG_BLADDER_CANCER	KEGG_BLADDER_CANCER	38	0.505108269568732	1.8369383856426	0.00189268145716855	0.00861170063011691	0.00478151104968897	2444	tags=47%, list=18%, signal=39%	4318/7057/1871/23604/673/1612/5594/5894/1956/5595/1950/4313/9252/1870/1869/3845/4193/7422
KEGG_PANCREATIC_CANCER	KEGG_PANCREATIC_CANCER	KEGG_PANCREATIC_CANCER	69	0.409003014176635	1.67052939740623	0.00189090469522917	0.00861170063011691	0.00478151104968897	2057	tags=35%, list=15%, signal=30%	6774/5337/1871/10928/7039/5899/8517/673/1147/5594/5293/5894/1956/4087/23533/5595/7046/5294/1950/5291/1870/1869/3845/598
KEGG_INTESTINAL_IMMUNE_NETWORK_FOR_IGA_PRODUCTION	KEGG_INTESTINAL_IMMUNE_NETWORK_FOR_IGA_PRODUCTION	KEGG_INTESTINAL_IMMUNE_NETWORK_FOR_IGA_PRODUCTION	47	-0.47985	-1.73387	0.00213711114651578	0.00948668850404568	0.00526733427639321	2330	tags=40%, list=17%, signal=34%	942/3122/3115/3119/608/3108/23495/115650/3109/958/3676/3117/23308/3113/3111/3112/29851/3695/959
KEGG_NOD_LIKE_RECEPTOR_SIGNALING_PATHWAY	KEGG_NOD_LIKE_RECEPTOR_SIGNALING_PATHWAY	KEGG_NOD_LIKE_RECEPTOR_SIGNALING_PATHWAY	53	0.432099550787124	1.66715517190501	0.00247883246574007	0.0107416073515403	0.00596410818824679	3327	tags=45%, list=24%, signal=34%	1432/8517/84674/1147/5594/114548/838/3553/22861/22900/5595/4671/4210/329/6354/9051/7128/7205/2919/257397/64170/29108/260434/6356
KEGG_AUTOIMMUNE_THYROID_DISEASE	KEGG_AUTOIMMUNE_THYROID_DISEASE	KEGG_AUTOIMMUNE_THYROID_DISEASE	50	-0.468533	-1.71115	0.00281910841588995	0.0119320402719063	0.00662507730539621	2977	tags=36%, list=22%, signal=28%	3448/941/5551/942/3122/3115/3119/3108/3002/3109/958/3117/3113/356/3111/3112/1493/959
KEGG_RNA_DEGRADATION	KEGG_RNA_DEGRADATION	KEGG_RNA_DEGRADATION	46	-0.467689	-1.6827	0.00310790402047736	0.0128554211756109	0.00713776999918245	3022	tags=43%, list=22%, signal=34%	23658/27258/51010/5393/5394/51691/118460/2026/28960/84186/2027/196513/11340/56915/25804/57819/51013/23404/51690/23016
KEGG_MAPK_SIGNALING_PATHWAY	KEGG_MAPK_SIGNALING_PATHWAY	KEGG_MAPK_SIGNALING_PATHWAY	250	0.278383773470457	1.38142435963114	0.00371458250421917	0.0150234225726198	0.00834151860596586	2095	tags=23%, list=15%, signal=20%	1647/1432/6788/777/5058/5534/7850/2885/409/6195/8517/1843/115727/673/8569/5566/6416/1649/9261/10912/2353/1147/5594/2258/10746/57551/5894/3553/3303/2872/774/1956/929/5494/3304/5595/5062/6655/3554/7046/59283/5801/4616/1398/4914/4296/7132/1950/9252/776/5606/8398/1845/5906/3845/408/4149/5609
KEGG_B_CELL_RECEPTOR_SIGNALING_PATHWAY	KEGG_B_CELL_RECEPTOR_SIGNALING_PATHWAY	KEGG_B_CELL_RECEPTOR_SIGNALING_PATHWAY	70	0.382312818515146	1.57646629694873	0.00537464637887006	0.021264905238138	0.0118070034867626	1311	tags=29%, list=10%, signal=26%	11025/10451/5534/2932/2885/5336/8517/4067/6850/2353/1147/5594/5293/5894/7409/23533/5595/6655/3635/5294
KEGG_NUCLEOTIDE_EXCISION_REPAIR	KEGG_NUCLEOTIDE_EXCISION_REPAIR	KEGG_NUCLEOTIDE_EXCISION_REPAIR	43	-0.472358	-1.66526	0.00594748067332766	0.0224759631349088	0.0124794242969997	3628	tags=53%, list=26%, signal=40%	5424/9978/2072/7507/2068/4331/2968/6117/5111/1069/2073/5426/5985/5983/56655/2071/5984/2967/3978/6118/404672/6119/54107
KEGG_ADIPOCYTOKINE_SIGNALING_PATHWAY	KEGG_ADIPOCYTOKINE_SIGNALING_PATHWAY	KEGG_ADIPOCYTOKINE_SIGNALING_PATHWAY	64	0.395955564630792	1.59937543359158	0.0060512208440139	0.0224759631349088	0.0124794242969997	2325	tags=34%, list=17%, signal=29%	6774/8660/3717/6256/8517/1147/7133/2180/10645/7132/1374/9021/6257/3953/8471/51094/6794/6517/5571/2181/5562/9370
KEGG_T_CELL_RECEPTOR_SIGNALING_PATHWAY	KEGG_T_CELL_RECEPTOR_SIGNALING_PATHWAY	KEGG_T_CELL_RECEPTOR_SIGNALING_PATHWAY	102	-0.366707	-1.50708	0.00598452313274931	0.0224759631349088	0.0124794242969997	863	tags=23%, list=6%, signal=21%	926/10125/925/868/917/27040/4690/10000/84433/3932/3265/5335/1493/916/29851/919/959/2534/1019/5533/3702/915/5588
KEGG_DORSO_VENTRAL_AXIS_FORMATION	KEGG_DORSO_VENTRAL_AXIS_FORMATION	KEGG_DORSO_VENTRAL_AXIS_FORMATION	23	0.551082983133268	1.79528791515353	0.00636672646283528	0.0231748843247204	0.0128674892722566	1169	tags=43%, list=8%, signal=40%	2114/4853/2885/4851/5594/1956/2120/56907/5595/6655
KEGG_ENDOMETRIAL_CANCER	KEGG_ENDOMETRIAL_CANCER	KEGG_ENDOMETRIAL_CANCER	50	0.424572419902245	1.62923453942949	0.00652779201816951	0.0232952577903304	0.0129343247418839	2713	tags=48%, list=20%, signal=39%	1495/5728/2932/2885/673/5594/5170/5293/5894/10297/1956/23533/5595/6655/5294/1950/5291/1499/3845/324/6934/29119/3611/8503
KEGG_BASE_EXCISION_REPAIR	KEGG_BASE_EXCISION_REPAIR	KEGG_BASE_EXCISION_REPAIR	31	-0.512119	-1.68099	0.00674944876981558	0.0235918995550854	0.0130990304065252	2111	tags=39%, list=15%, signal=33%	27301/142/5111/5426/56655/2237/4968/10038/4913/3978/54107/328
KEGG_ADHERENS_JUNCTION	KEGG_ADHERENS_JUNCTION	KEGG_ADHERENS_JUNCTION	67	0.392147214475811	1.60147956008329	0.00687016855175565	0.0235918995550854	0.0130990304065252	2621	tags=40%, list=19%, signal=33%	1387/1495/87/8826/7414/5594/10163/7454/10810/1956/4087/5595/3480/60/7046/81/6714/1457/5792/9855/3643/1499/7082/6934/2033/29119/998
KEGG_TYPE_I_DIABETES_MELLITUS	KEGG_TYPE_I_DIABETES_MELLITUS	KEGG_TYPE_I_DIABETES_MELLITUS	41	-0.479229	-1.67634	0.00744365588988643	0.0250878772585061	0.0139296484489103	3185	tags=44%, list=23%, signal=34%	3592/941/3458/7124/5551/942/3122/3115/3119/3108/3002/3109/4049/3117/3113/356/3111/3112
KEGG_APOPTOSIS	KEGG_APOPTOSIS	KEGG_APOPTOSIS	80	0.361611826311666	1.51329421321638	0.00794258604980486	0.0262827392920815	0.0145930767613639	1816	tags=30%, list=13%, signal=26%	11213/4615/5534/8794/8743/8837/8517/317/5566/1147/5293/637/3553/23533/3554/5294/329/4914/7132/823/5291/5576/3556/1439
KEGG_GAP_JUNCTION	KEGG_GAP_JUNCTION	KEGG_GAP_JUNCTION	74	0.362478341985991	1.50255149466181	0.00873811233879615	0.0283988651010875	0.0157680222654968	3304	tags=43%, list=24%, signal=33%	196883/3709/2885/5566/1453/2773/5594/108/10746/5894/1956/2776/5595/6655/6714/1950/112/84617/5330/3845/7082/1812/1813/111/114/2911/56034/347688/2771/5598/2977/7846
KEGG_CHRONIC_MYELOID_LEUKEMIA	KEGG_CHRONIC_MYELOID_LEUKEMIA	KEGG_CHRONIC_MYELOID_LEUKEMIA	69	0.371647925793543	1.51795650399544	0.00893471986641906	0.0285284037840047	0.015839946577585	2181	tags=36%, list=16%, signal=31%	1871/6777/2885/6776/8517/673/1147/5594/9846/5293/5894/23533/5595/6655/7046/5294/1398/867/6464/5291/1870/1869/3845/598/4193
KEGG_NON_SMALL_CELL_LUNG_CANCER	KEGG_NON_SMALL_CELL_LUNG_CANCER	KEGG_NON_SMALL_CELL_LUNG_CANCER	51	0.411562293971101	1.57142970115748	0.010257729918746	0.0319393695142873	0.0177338315406106	2029	tags=43%, list=15%, signal=37%	1871/6256/2885/7039/5336/673/5594/5170/5293/5894/1956/23533/5595/6655/5294/1950/5291/6257/1870/1869/5915/3845
KEGG_AXON_GUIDANCE	KEGG_AXON_GUIDANCE	KEGG_AXON_GUIDANCE	123	0.307249058884702	1.38825225695413	0.0103539714359503	0.0319393695142873	0.0177338315406106	3148	tags=33%, list=23%, signal=25%	10154/5058/64218/5534/2932/2050/22885/2047/2773/5594/6093/3985/57522/5595/9353/5062/23365/2242/3897/5063/80031/3983/10507/3845/6091/10725/57715/10509/9901/219699/2049/285220/998/5530/5998/387/5365/2771/8482/56896
KEGG_GLIOMA	KEGG_GLIOMA	KEGG_GLIOMA	61	0.374482115224412	1.48865008280306	0.0110843657814406	0.0336225762037032	0.0186684055266368	2181	tags=38%, list=16%, signal=32%	1871/5728/818/2885/7039/5336/673/5594/5293/5894/1956/23533/5595/3480/6655/5294/1950/6464/5291/1870/1869/3845/4193
KEGG_ASTHMA	KEGG_ASTHMA	KEGG_ASTHMA	29	-0.522729	-1.69672	0.0117976547047982	0.0346318251011819	0.0192287750706389	2628	tags=41%, list=19%, signal=34%	7124/3122/3115/3119/3108/3109/958/3117/3113/3111/3112/959
KEGG_GLYCOSPHINGOLIPID_BIOSYNTHESIS_LACTO_AND_NEOLACTO_SERIES	KEGG_GLYCOSPHINGOLIPID_BIOSYNTHESIS_LACTO_AND_NEOLACTO_SERIES	KEGG_GLYCOSPHINGOLIPID_BIOSYNTHESIS_LACTO_AND_NEOLACTO_SERIES	24	0.511393221513403	1.66081345344356	0.0116412956243983	0.0346318251011819	0.0192287750706389	2692	tags=38%, list=20%, signal=30%	6484/2529/2683/10402/2651/8708/84002/79369/2528
KEGG_GNRH_SIGNALING_PATHWAY	KEGG_GNRH_SIGNALING_PATHWAY	KEGG_GNRH_SIGNALING_PATHWAY	96	0.325901022941909	1.40316147724331	0.0125279790749052	0.0361919395497263	0.0200950040299232	2095	tags=28%, list=15%, signal=24%	1432/5337/5580/196883/3709/818/2885/5566/6416/5594/108/10746/5894/1956/2185/2776/5595/6655/6714/4313/776/5606/8398/112/5330/3845/5609
KEGG_N_GLYCAN_BIOSYNTHESIS	KEGG_N_GLYCAN_BIOSYNTHESIS	KEGG_N_GLYCAN_BIOSYNTHESIS	44	-0.451885	-1.60062	0.0137076047228234	0.0383812932239055	0.0213106081520817	2782	tags=45%, list=20%, signal=36%	29880/440138/8703/199857/10905/1798/3703/11253/1650/8813/56052/79053/54344/2530/1603/10195/57171/57134/79796/6480
KEGG_STARCH_AND_SUCROSE_METABOLISM	KEGG_STARCH_AND_SUCROSE_METABOLISM	KEGG_STARCH_AND_SUCROSE_METABOLISM	50	0.401735143865773	1.54159983410956	0.0136555586819901	0.0383812932239055	0.0213106081520817	1150	tags=16%, list=8%, signal=15%	2548/3101/5836/2632/55276/279/5236/3099
KEGG_BASAL_TRANSCRIPTION_FACTORS	KEGG_BASAL_TRANSCRIPTION_FACTORS	KEGG_BASAL_TRANSCRIPTION_FACTORS	32	-0.48293	-1.59665	0.0148574774567944	0.0397983893007202	0.0220974284145121	3032	tags=31%, list=22%, signal=24%	2963/10629/2968/6881/6878/6908/2961/6873/2967/2958
KEGG_PROPANOATE_METABOLISM	KEGG_PROPANOATE_METABOLISM	KEGG_PROPANOATE_METABOLISM	30	-0.487436	-1.58965	0.0150392997333636	0.0397983893007202	0.0220974284145121	2672	tags=47%, list=19%, signal=38%	4329/219/1892/32/8803/8802/26275/84532/34/8801/23417/84693/38/3945
KEGG_PROSTATE_CANCER	KEGG_PROSTATE_CANCER	KEGG_PROSTATE_CANCER	85	0.343200795594481	1.44827636489349	0.015088400339284	0.0397983893007202	0.0220974284145121	2469	tags=33%, list=18%, signal=27%	1387/1871/5728/2932/2885/7039/8517/673/1147/5594/5170/5293/5894/1956/23533/5595/3480/6655/5294/1950/5291/1870/1869/1499/3845/4193/6934/2033
KEGG_ALZHEIMERS_DISEASE	KEGG_ALZHEIMERS_DISEASE	KEGG_ALZHEIMERS_DISEASE	131	-0.335767	-1.43769	0.0150587532061237	0.0397983893007202	0.0220974284145121	2140	tags=27%, list=16%, signal=23%	1340/808/1347/4716/4697/1337/25825/4729/4706/4701/1329/1345/4704/4694/4717/4702/1351/4696/4713/9377/54205/4711/4722/7388/7386/1537/801/1350/4723/4725/4708/4714/4728/4724/3710/5533
KEGG_ALDOSTERONE_REGULATED_SODIUM_REABSORPTION	KEGG_ALDOSTERONE_REGULATED_SODIUM_REABSORPTION	KEGG_ALDOSTERONE_REGULATED_SODIUM_REABSORPTION	39	0.438716749214767	1.60068179443862	0.0154776918520111	0.0402419988152287	0.0223437356059107	2838	tags=41%, list=21%, signal=33%	8660/5594/5170/5293/23533/5595/482/5294/5291/3643/478/8471/3845/3291/8503/23327
KEGG_CELL_ADHESION_MOLECULES_CAMS	KEGG_CELL_ADHESION_MOLECULES_CAMS	KEGG_CELL_ADHESION_MOLECULES_CAMS	121	-0.326064	-1.38039	0.0164173644444322	0.0420839482941784	0.023366449023951	2330	tags=26%, list=17%, signal=22%	942/3122/3115/3119/57555/933/24146/3108/5133/4267/5797/3109/958/3676/4897/3655/3117/23308/8506/3113/26047/926/925/3111/3112/1493/29851/3695/3384/959/914/923
KEGG_PEROXISOME	KEGG_PEROXISOME	KEGG_PEROXISOME	69	-0.378059	-1.47106	0.0170234767816077	0.0430315663090639	0.0238925989917301	3454	tags=41%, list=25%, signal=31%	8310/8800/196743/26063/55670/5824/225/8504/9409/3418/8443/5191/5827/5195/10654/5052/54677/1891/5189/23417/10901/10478/4358/373156/5830/8799/2053/6647
KEGG_HEMATOPOIETIC_CELL_LINEAGE	KEGG_HEMATOPOIETIC_CELL_LINEAGE	KEGG_HEMATOPOIETIC_CELL_LINEAGE	85	0.33997311222726	1.43465583255758	0.0172830515886679	0.0430892519059939	0.0239246280102685	1193	tags=25%, list=9%, signal=23%	4311/3684/1378/1438/290/3570/1441/3690/7850/3674/2209/3678/2057/1604/2322/2811/3553/929/2815/966/3554
KEGG_GLYOXYLATE_AND_DICARBOXYLATE_METABOLISM	KEGG_GLYOXYLATE_AND_DICARBOXYLATE_METABOLISM	KEGG_GLYOXYLATE_AND_DICARBOXYLATE_METABOLISM	15	-0.594498	-1.645	0.0199567315735881	0.0490827722485545	0.0272524357192668	3391	tags=53%, list=25%, signal=40%	4522/441024/132158/25902/1431/9380/4191/4190
KEGG_VALINE_LEUCINE_AND_ISOLEUCINE_DEGRADATION	KEGG_VALINE_LEUCINE_AND_ISOLEUCINE_DEGRADATION	KEGG_VALINE_LEUCINE_AND_ISOLEUCINE_DEGRADATION	41	-0.439858	-1.53862	0.0246787817114931	0.0598871769532232	0.033251411148117	2672	tags=41%, list=19%, signal=34%	4329/219/1892/35/64087/36/3712/26275/587/34/594/1629/84693/38/5019/11112/56922
KEGG_VASCULAR_SMOOTH_MUSCLE_CONTRACTION	KEGG_VASCULAR_SMOOTH_MUSCLE_CONTRACTION	KEGG_VASCULAR_SMOOTH_MUSCLE_CONTRACTION	106	0.30787547756312	1.35432011837961	0.0277527512442224	0.0664605358743221	0.0369011650892708	3535	tags=40%, list=26%, signal=30%	5580/196883/3709/146/673/5566/10398/5594/108/59/5894/3778/6093/4638/2776/4637/4660/5595/23365/776/8398/112/148/5330/4881/111/2768/114/9826/387/163688/805/72/147/2977/4659/84647/50487/9138/10242/5332/10266
KEGG_AMINOACYL_TRNA_BIOSYNTHESIS	KEGG_AMINOACYL_TRNA_BIOSYNTHESIS	KEGG_AMINOACYL_TRNA_BIOSYNTHESIS	13	-0.614219	-1.63099	0.0284365475351821	0.0668502448530416	0.0371175448576749	4015	tags=69%, list=29%, signal=49%	10056/92935/55157/55699/25973/10667/23395/54938/79731
KEGG_CITRATE_CYCLE_TCA_CYCLE	KEGG_CITRATE_CYCLE_TCA_CYCLE	KEGG_CITRATE_CYCLE_TCA_CYCLE	30	-0.467904	-1.52595	0.0286501049370178	0.0668502448530416	0.0371175448576749	3544	tags=57%, list=26%, signal=42%	3419/3421/2271/6392/5106/3418/6389/8803/8802/3420/1737/1431/5160/4191/8801/5162/4190
KEGG_PANTOTHENATE_AND_COA_BIOSYNTHESIS	KEGG_PANTOTHENATE_AND_COA_BIOSYNTHESIS	KEGG_PANTOTHENATE_AND_COA_BIOSYNTHESIS	16	0.551218157608758	1.59067993254518	0.0296866401724926	0.0683920064733373	0.037973583698325	2175	tags=44%, list=16%, signal=37%	8876/586/80025/1806/51733/80347/79646
KEGG_GALACTOSE_METABOLISM	KEGG_GALACTOSE_METABOLISM	KEGG_GALACTOSE_METABOLISM	25	0.478171571688818	1.57667864226917	0.0308521824490476	0.0693679880202473	0.0385154820702357	1150	tags=32%, list=8%, signal=29%	2548/3101/2717/55276/2683/5236/2720/3099
KEGG_CELL_CYCLE	KEGG_CELL_CYCLE	KEGG_CELL_CYCLE	112	-0.331723	-1.38933	0.0308725660969233	0.0693679880202473	0.0385154820702357	2745	tags=37%, list=20%, signal=30%	4089/9184/990/246184/8556/4085/4609/8697/8317/3066/10459/4175/29882/9232/4176/5111/8454/3065/595/8379/7465/898/25847/8881/1874/1017/10393/64682/5933/1021/7043/5934/10971/11200/4172/51433/1875/994/4088/894/1019
KEGG_CARDIAC_MUSCLE_CONTRACTION	KEGG_CARDIAC_MUSCLE_CONTRACTION	KEGG_CARDIAC_MUSCLE_CONTRACTION	66	-0.374603	-1.44972	0.0339979761381637	0.0749501826682957	0.0416149076700775	2929	tags=33%, list=21%, signal=26%	488/7134/1327/782/9254/93589/1340/1347/784/476/1337/783/1329/1345/7169/1351/486/9377/7388/7386/1537/1350
KEGG_MTOR_SIGNALING_PATHWAY	KEGG_MTOR_SIGNALING_PATHWAY	KEGG_MTOR_SIGNALING_PATHWAY	46	0.374312598895066	1.40710769600125	0.0341805778102667	0.0749501826682957	0.0416149076700775	2713	tags=37%, list=20%, signal=30%	6195/673/5594/5170/5293/51719/3091/23533/5595/5294/5291/9470/6794/5562/7422/7249/8503
KEGG_RENIN_ANGIOTENSIN_SYSTEM	KEGG_RENIN_ANGIOTENSIN_SYSTEM	KEGG_RENIN_ANGIOTENSIN_SYSTEM	16	0.544803045189844	1.57216749704405	0.0347215292124396	0.0752299799602857	0.0417702607066942	3618	tags=56%, list=26%, signal=42%	4311/290/1511/186/1215/5972/2028/4012/1359
KEGG_OLFACTORY_TRANSDUCTION	KEGG_OLFACTORY_TRANSDUCTION	KEGG_OLFACTORY_TRANSDUCTION	373	0.229764234852555	1.18658508820776	0.0423368138747851	0.0906505897083634	0.0503323112319427	5397	tags=43%, list=39%, signal=27%	818/409/393046/5566/7932/286362/403257/150681/390264/120065/2978/127077/81697/26740/219957/653166/390078/81285/219959/219484/343171/390445/346517/442361/4991/121364/390036/3000/26212/391192/125958/26476/391194/341416/390155/390648/9626/9635/256144/219983/26533/219482/120776/119774/127064/390892/162998/120787/390066/219447/163688/135941/343169/26664/391211/805/158131/283694/81328/390038/219469/126…
KEGG_NOTCH_SIGNALING_PATHWAY	KEGG_NOTCH_SIGNALING_PATHWAY	KEGG_NOTCH_SIGNALING_PATHWAY	41	0.391771725106348	1.45026012817137	0.0457890685836662	0.0969024474677587	0.0538035567200974	2912	tags=46%, list=21%, signal=37%	4853/1387/8650/182/113878/4851/55534/1857/171558/6868/151636/55851/3516/23385/2033/9612/3714/1488/10683
KEGG_NATURAL_KILLER_CELL_MEDIATED_CYTOTOXICITY	KEGG_NATURAL_KILLER_CELL_MEDIATED_CYTOTOXICITY	KEGG_NATURAL_KILLER_CELL_MEDIATED_CYTOTOXICITY	129	0.275635391461002	1.25284582006746	0.051882819915797	0.10853647384684	0.0602631665083667	1689	tags=22%, list=12%, signal=20%	10451/5058/5534/3454/8794/2885/8743/5336/7305/673/3460/6850/5594/5293/5894/3459/637/3455/7409/2185/23533/5595/6655/3689/5294/3440/6464/5291/79465
KEGG_CALCIUM_SIGNALING_PATHWAY	KEGG_CALCIUM_SIGNALING_PATHWAY	KEGG_CALCIUM_SIGNALING_PATHWAY	169	0.261495573961802	1.23190529142084	0.0543160528740003	0.11233547298941	0.0623725009079429	3660	tags=35%, list=27%, signal=26%	5724/5023/777/196883/5534/3709/818/146/683/5336/3274/5566/108/3362/774/4638/1956/2185/2776/8877/623/6546/1139/5257/776/5027/3269/148/2769/5330/2065/5256/2902/624/1812/4923/2066/10800/7125/5026/5530/114/6543/2911/492/163688/805/5255/147/5021/3363/6262/6870/493/1128/5332/5737/2905/1909
KEGG_PROTEASOME	KEGG_PROTEASOME	KEGG_PROTEASOME	41	-0.39563	-1.38391	0.0615384615384615	0.125784157363105	0.0698396709477042	3242	tags=46%, list=24%, signal=36%	5693/5682/5709/5705/5683/5684/3458/5692/5714/9861/5685/5694/5721/10213/5695/5690/5701/5689/5686
KEGG_INOSITOL_PHOSPHATE_METABOLISM	KEGG_INOSITOL_PHOSPHATE_METABOLISM	KEGG_INOSITOL_PHOSPHATE_METABOLISM	46	0.355283725599265	1.33557477367966	0.062200956937799	0.125784157363105	0.0698396709477042	2107	tags=30%, list=15%, signal=26%	3705/3632/5728/5336/5293/10423/3613/8394/5294/5291/3636/8871/5330/253430
KEGG_ARRHYTHMOGENIC_RIGHT_VENTRICULAR_CARDIOMYOPATHY_ARVC	KEGG_ARRHYTHMOGENIC_RIGHT_VENTRICULAR_CARDIOMYOPATHY_ARVC	KEGG_ARRHYTHMOGENIC_RIGHT_VENTRICULAR_CARDIOMYOPATHY_ARVC	73	0.316967102668262	1.30512011242311	0.0665024630541872	0.133004926108374	0.0738488889901905	2024	tags=23%, list=15%, signal=20%	1495/87/3690/3674/3693/3678/4000/1824/1000/60/81/59283/6546/5318/776/1499/3673
KEGG_SMALL_CELL_LUNG_CANCER	KEGG_SMALL_CELL_LUNG_CANCER	KEGG_SMALL_CELL_LUNG_CANCER	81	0.307842448863081	1.28890328542527	0.0735294117647059	0.145460358056266	0.0807645712747341	2067	tags=28%, list=15%, signal=24%	1871/6256/5728/3674/8517/317/1030/1147/8554/5293/5743/51588/23533/5294/329/5291/6257/1870/1869/5915/3673/598/4149
KEGG_CYTOKINE_CYTOKINE_RECEPTOR_INTERACTION	KEGG_CYTOKINE_CYTOKINE_RECEPTOR_INTERACTION	KEGG_CYTOKINE_CYTOKINE_RECEPTOR_INTERACTION	242	0.238633038616197	1.18451036200971	0.0756488901195265	0.148044064534987	0.0821991335763955	1888	tags=19%, list=14%, signal=17%	58191/1438/3625/3600/3570/3454/1441/8794/7850/9547/8743/4352/2057/5008/91/3604/3460/8807/2322/7133/3459/8809/3553/3455/10673/1956/4055/3597/3554/7046/3440/10344/6354/7132/1230/1950/58985/650/5473/51330/269/3556/1439/8995/3953/59067
KEGG_SULFUR_METABOLISM	KEGG_SULFUR_METABOLISM	KEGG_SULFUR_METABOLISM	13	0.528882129221094	1.44242912673739	0.0790598290598291	0.15220434505954	0.0845090637693224	2415	tags=62%, list=18%, signal=51%	9060/166012/6799/6820/6821/6818/445329/50515
KEGG_CYSTEINE_AND_METHIONINE_METABOLISM	KEGG_CYSTEINE_AND_METHIONINE_METABOLISM	KEGG_CYSTEINE_AND_METHIONINE_METABOLISM	32	-0.415008	-1.37209	0.079447322970639	0.15220434505954	0.0845090637693224	1022	tags=34%, list=7%, signal=32%	51074/27430/1788/2806/191/4144/2805/6723/4507/3945/1786
KEGG_GLYCOSAMINOGLYCAN_DEGRADATION	KEGG_GLYCOSAMINOGLYCAN_DEGRADATION	KEGG_GLYCOSAMINOGLYCAN_DEGRADATION	20	0.463043797377037	1.4247697592986	0.0808988764044944	0.153370786516854	0.0851567120047309	1091	tags=25%, list=8%, signal=23%	2799/3423/10855/411/2720
KEGG_GLYCOSPHINGOLIPID_BIOSYNTHESIS_GLOBO_SERIES	KEGG_GLYCOSPHINGOLIPID_BIOSYNTHESIS_GLOBO_SERIES	KEGG_GLYCOSPHINGOLIPID_BIOSYNTHESIS_GLOBO_SERIES	14	0.50865142096904	1.4242218979782	0.0907127429805616	0.170203290953219	0.0945026948034065	1897	tags=29%, list=14%, signal=25%	2717/26301/6483/4668
KEGG_NICOTINATE_AND_NICOTINAMIDE_METABOLISM	KEGG_NICOTINATE_AND_NICOTINAMIDE_METABOLISM	KEGG_NICOTINATE_AND_NICOTINAMIDE_METABOLISM	19	0.451611232706301	1.37298665881943	0.0919282511210762	0.170723894939142	0.0947917519615824	607	tags=21%, list=4%, signal=20%	4837/683/22978/64802
KEGG_BUTANOATE_METABOLISM	KEGG_BUTANOATE_METABOLISM	KEGG_BUTANOATE_METABOLISM	28	-0.418624	-1.34946	0.0973913043478261	0.179042599912165	0.0994105817904445	2395	tags=36%, list=17%, signal=30%	224/56898/219/6296/1892/35/5160/5162/38/5019
KEGG_VEGF_SIGNALING_PATHWAY	KEGG_VEGF_SIGNALING_PATHWAY	KEGG_VEGF_SIGNALING_PATHWAY	69	0.305593294618212	1.24816337438892	0.1025	0.18655	0.103578947368421	2713	tags=32%, list=20%, signal=26%	1432/5534/5336/9261/5594/5293/5894/5829/5743/8877/23533/5595/5294/6714/5291/8398/3845/10725/7422/998/5530/8503
KEGG_HOMOLOGOUS_RECOMBINATION	KEGG_HOMOLOGOUS_RECOMBINATION	KEGG_HOMOLOGOUS_RECOMBINATION	23	-0.434363	-1.33988	0.105924596050269	0.190874024565832	0.105979793859571	4207	tags=52%, list=31%, signal=36%	8438/29935/675/5424/10111/5893/6117/8940/7517/6118/6119/6742
KEGG_LONG_TERM_DEPRESSION	KEGG_LONG_TERM_DEPRESSION	KEGG_LONG_TERM_DEPRESSION	63	0.308198075557111	1.23758041036006	0.108433734939759	0.193479801559178	0.107426610466634	3551	tags=37%, list=26%, signal=27%	3709/4067/673/2773/5594/5894/2776/5595/3480/8398/1394/2892/5330/3845/2768/2775/2911/2771/2977/84647/50487/5332/5515
